# Supplementary material
Source: PubMed Central journal article supplement (PMC7406264)
Supplement: jciinsight-5-137289-s023.pdf [file jciinsight-5-137289-s023.pdf]

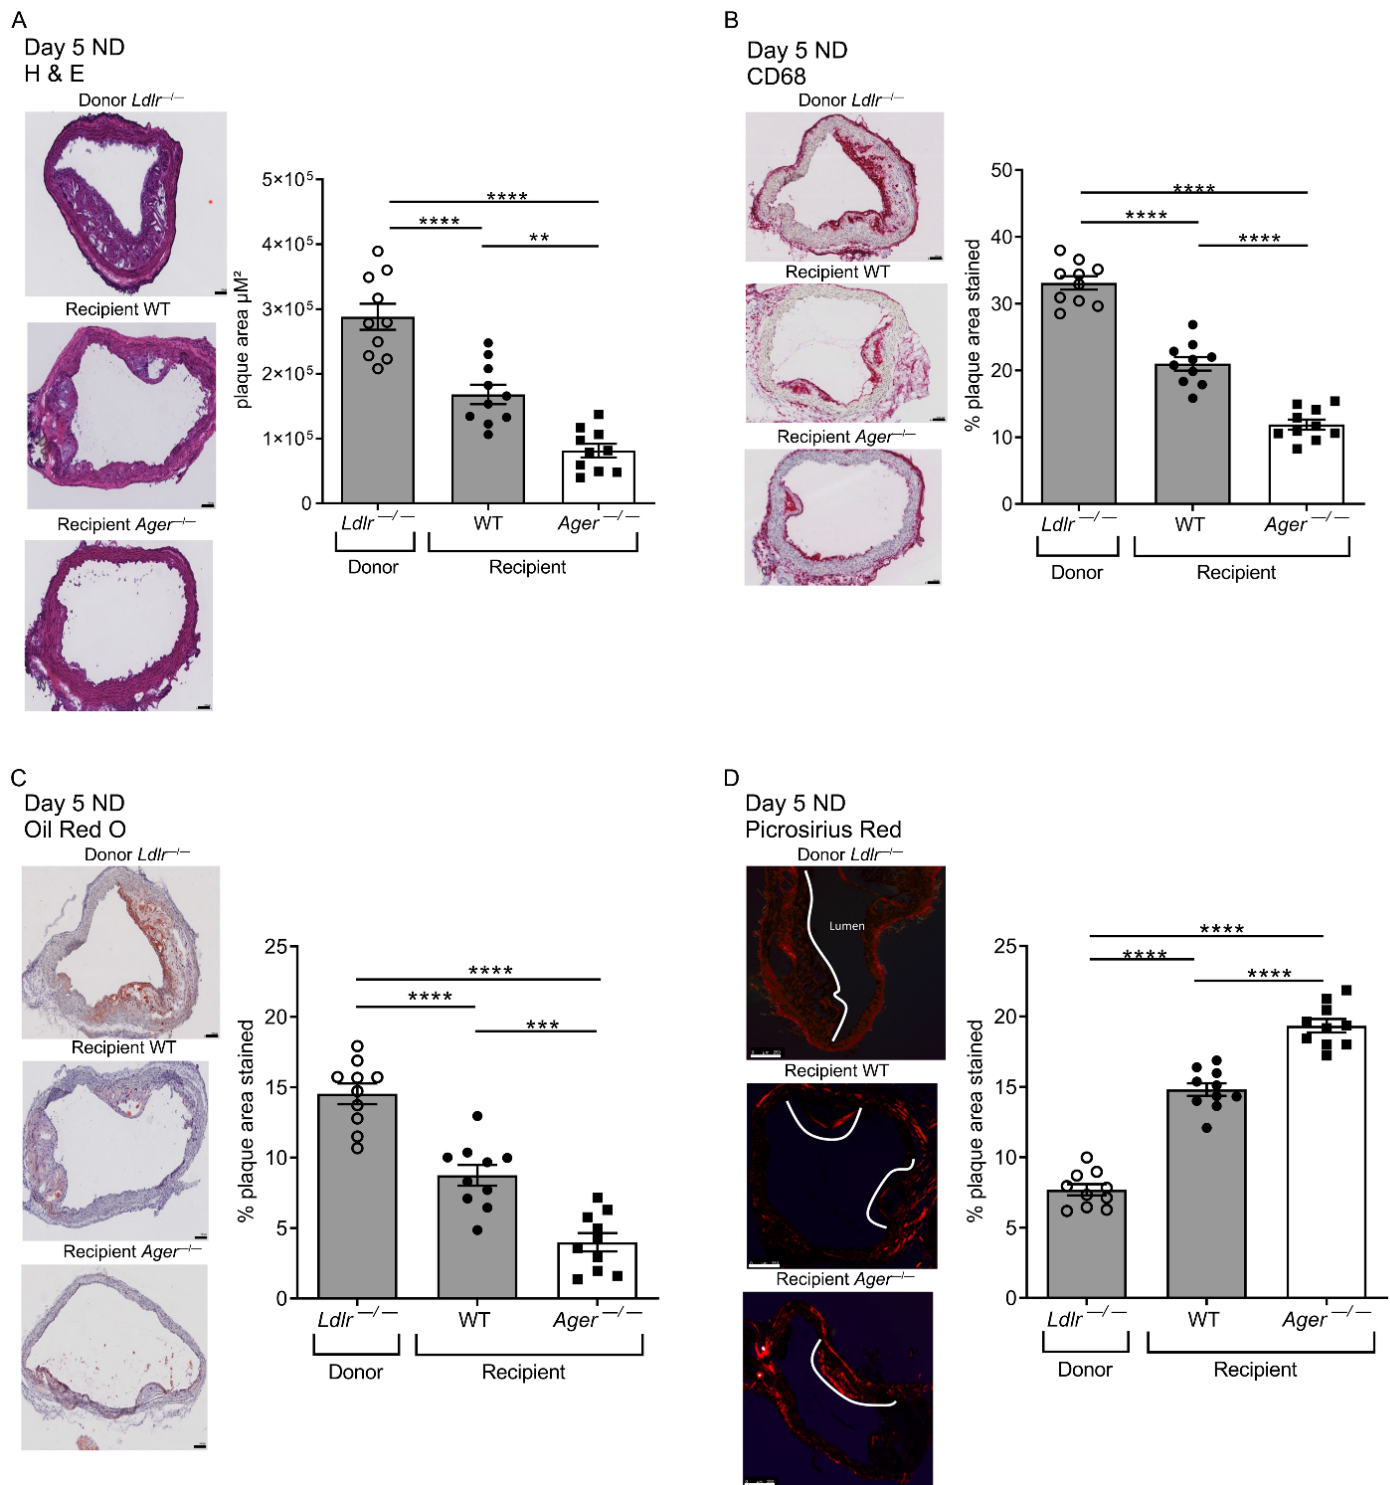

**Supplement Figure 1. RAGE impairs regression of non-diabetic atherosclerosis. A-B-C-D)** Aortic arch sections and quantification from non-diabetic *Ldlr*<sup>-/-</sup> donor/baseline mice, wild-type (WT), and *Ager*<sup>-/-</sup> recipient mice at day 5 post-transplantation were subjected to H&E (A), CD68 (B), Oil Red O (C) and Picrosirius Red staining (D) are shown. Scale bar: (A-C) 100  $\mu\text{m}$  and (D) 250  $\mu\text{m}$ . Representative images are shown and the mean  $\pm$  SEM is reported from N=10 mice/group. One-way ANOVA with post hoc Tukey's multiple comparisons test was used to assess the group difference. \*\* $p < 0.01$ , \*\*\* $p < 0.001$ , \*\*\*\* $p < 0.0001$ .

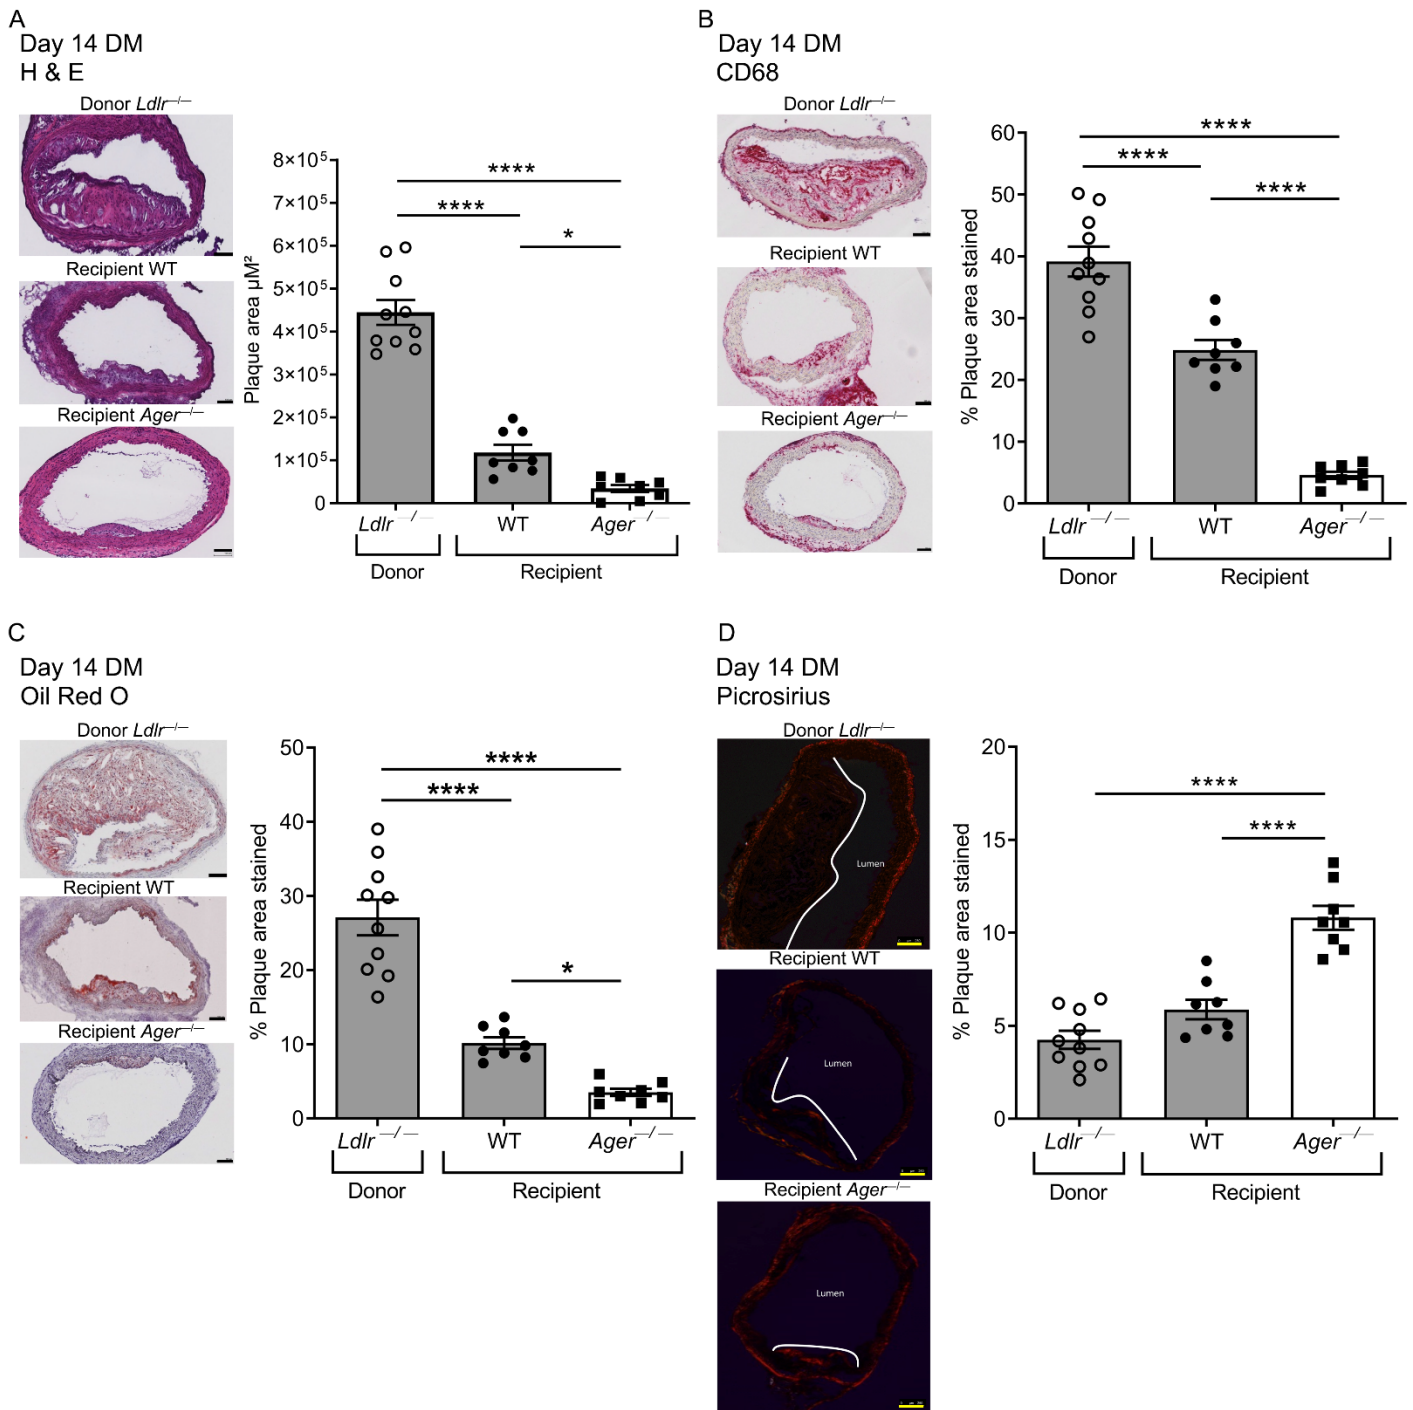

**Supplement Figure 2. RAGE impairs diabetic atherosclerotic plaque regression at day 14 post-transplantation. A-B-C-D** H&E (A), CD68 (B), Oil Red O staining (C) and Picosirius Red staining (D) of aortic arch transplant sections and their quantification were performed in diabetic *Ldlr*<sup>-/-</sup> non-transplanted mice, (donor, baseline), (WT), and *Ager*<sup>-/-</sup> diabetic recipient mice at day 14 post-transplantation. Scale bar: 100  $\mu$ m. Representative images are shown and the mean  $\pm$  SEM is reported from *Ldlr*<sup>-/-</sup> diabetic donors (N=10), WT diabetic recipients (N= 8), and *Ager*<sup>-/-</sup> diabetic recipients (N= 8). One-way ANOVA with post-hoc Tukey's multiple comparisons test was used to assess the group difference. \* $p$ <0.05, \*\*\*\* $p$ < 0.0001.

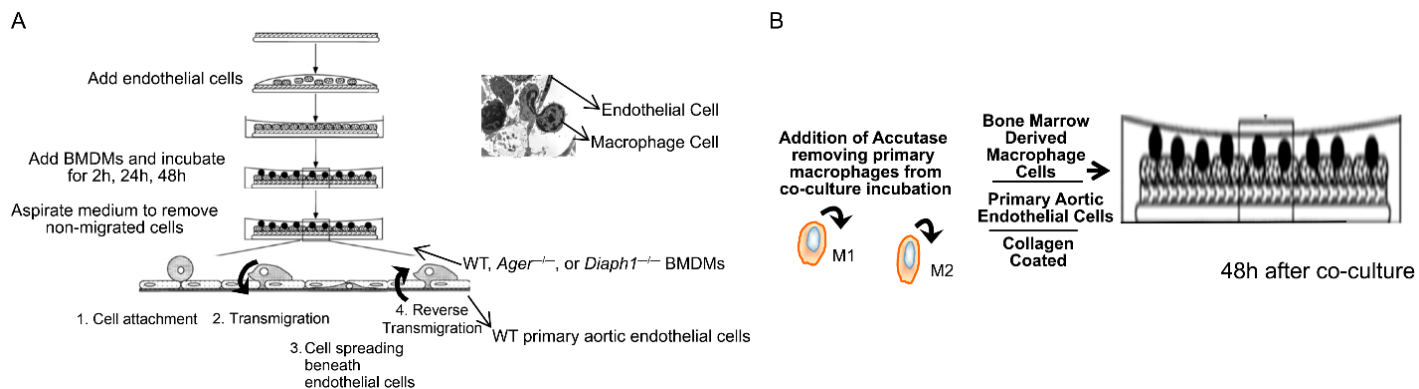

**Supplement Figure 3. In vitro assays of reverse transendothelial migration. A)** Schematic of macrophage reverse transendothelial migration assay using primary murine aortic endothelial cells (MAEC) and macrophages. Primary bone marrow derived macrophages (BMDMs) undergo (1) cell attachment, (2) transendothelial migration, (3) cell spreading beneath endothelial cells and (4) reverse transendothelial migration. **B)** Schematic of reverse transendothelial migration accutase macrophage removal assay.

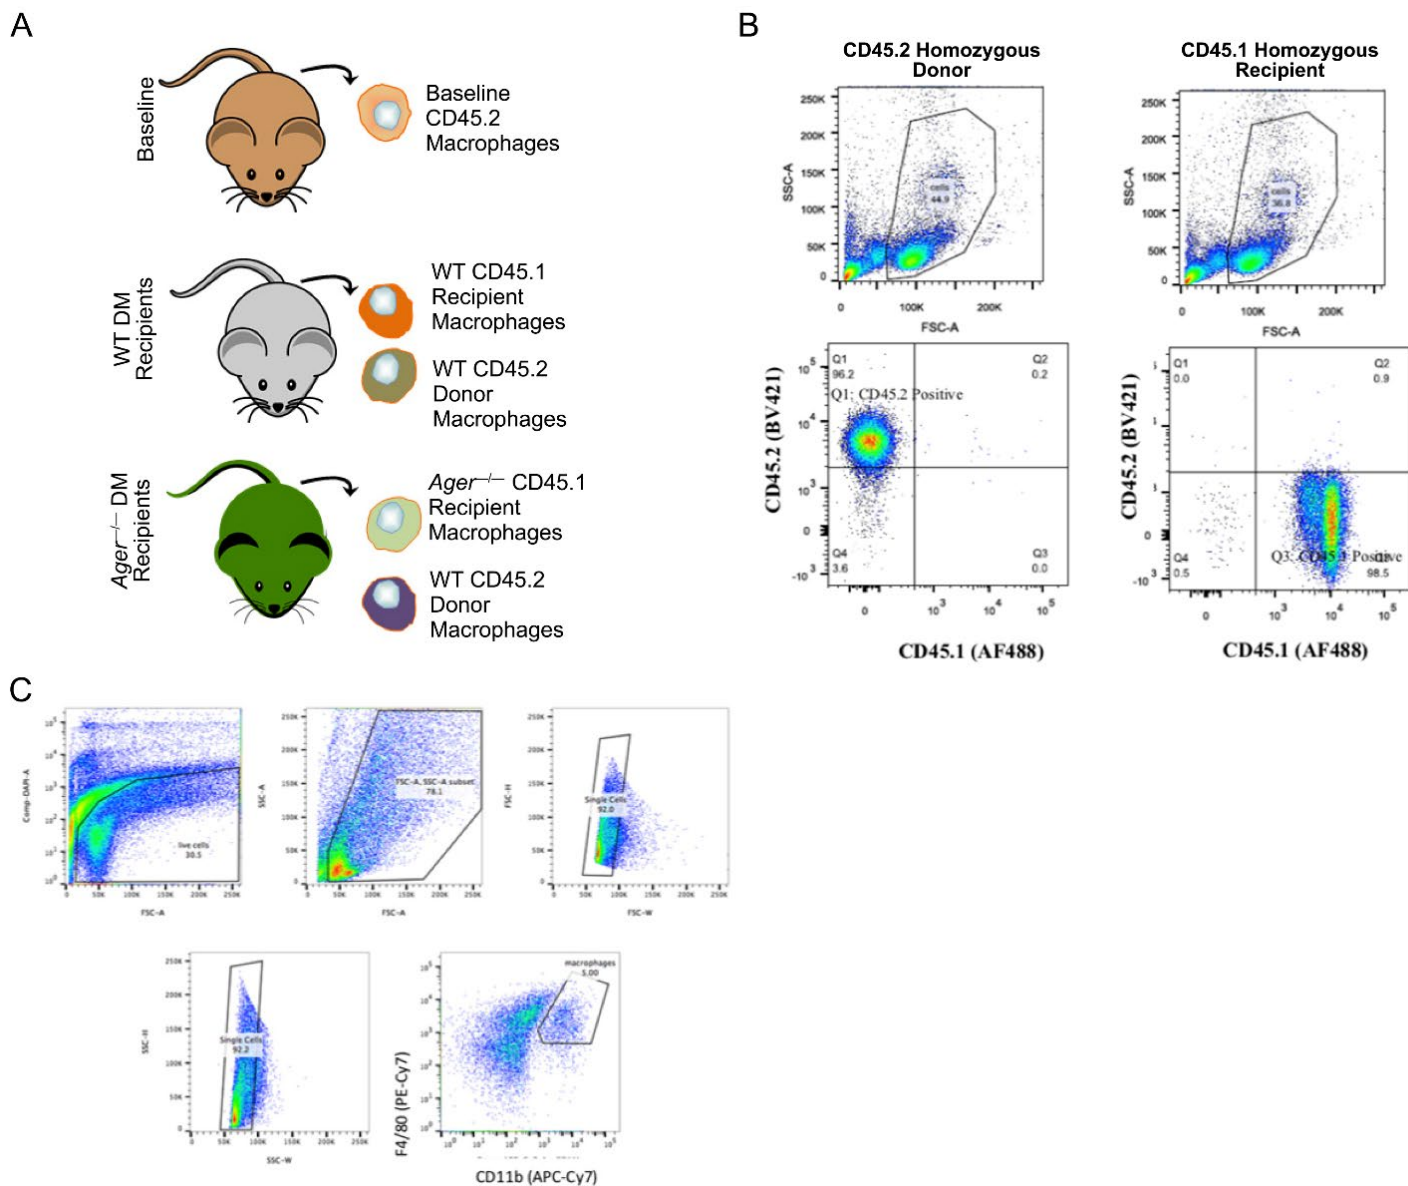

**Supplement Figure 4. Assessment of CD45.1 and CD45.2 macrophages in aortic arch transplanted atherosclerotic plaques.** **A)** Schematic of CD45.1 recipients and CD45.2 donor. **B)** CD45.1 and CD45.2 population verification in peripheral blood samples from diabetic WT or *Ager*<sup>-/-</sup> recipients and diabetic *Ldlr*<sup>-/-</sup> donor mice, respectively. **C)** Gating strategy for the identification of donor CD45.2 and recipient CD45.1 macrophages.



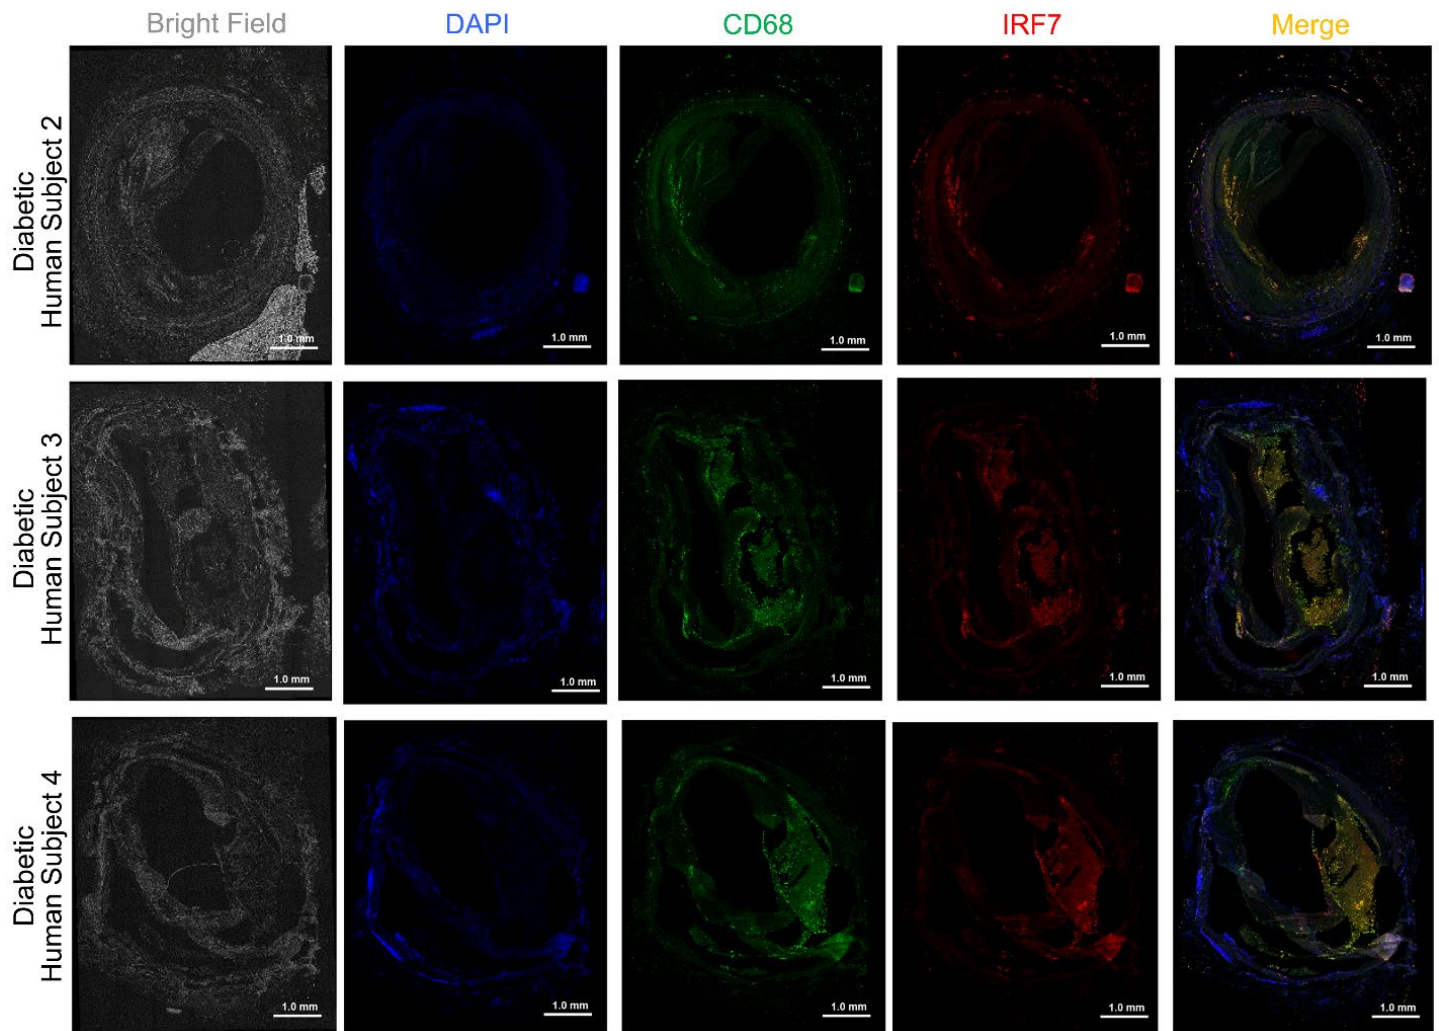

**Supplement Figure 5.** IRF7 co-localizes with CD68 in diabetic human atherosclerotic plaques. Representative images from N=3 subjects are shown. Scale bar: 1.0 mm.

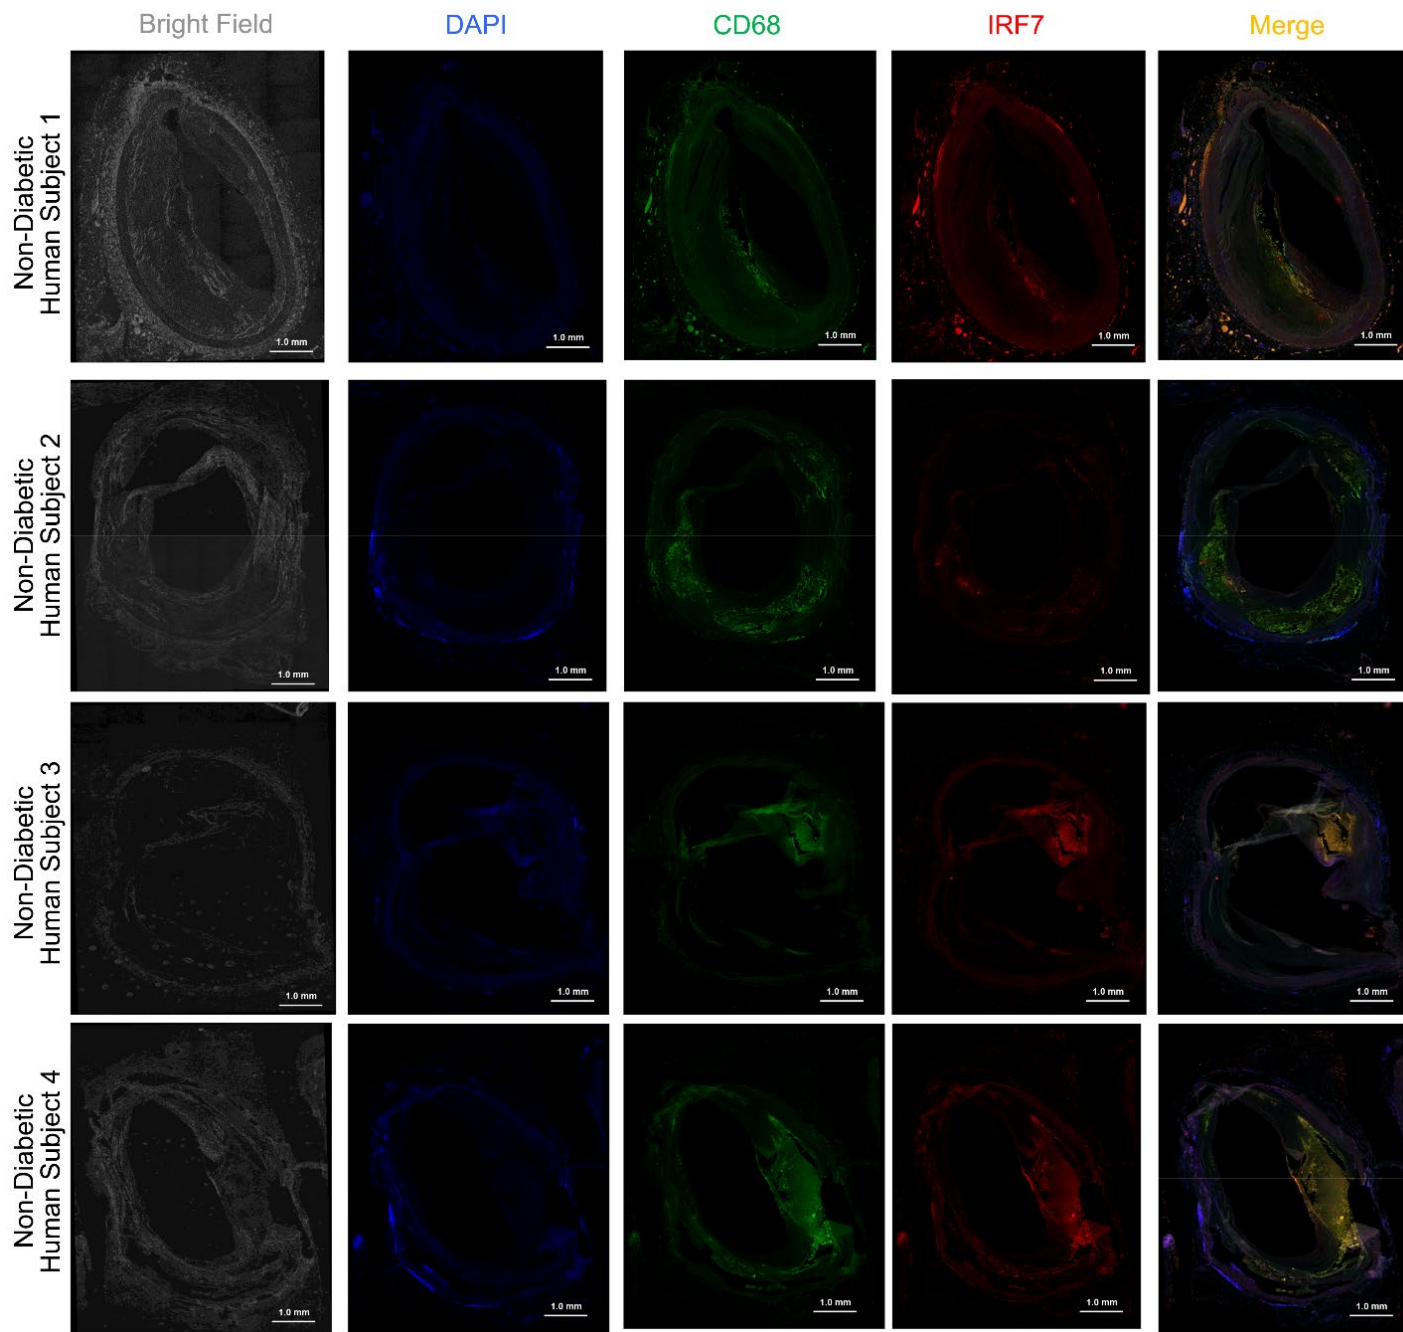

**Supplement Figure 6.** IRF7 co-localizes with CD68 in non-diabetic human atherosclerotic plaques. Representative images from N=4 non-diabetic subjects are shown Scale bar: 1.0 mm.

**Table S1A. Biochemical Parameters: Non-Diabetic Donor / Non-Diabetic Recipient Mice**

| <u>Parameter</u>          | <u>Mouse Group</u>                                  |                    |                                            |
|---------------------------|-----------------------------------------------------|--------------------|--------------------------------------------|
|                           | <i>Ldlr</i> <sup>-/-</sup><br>ND Donor <sup>#</sup> | WT<br>ND Recipient | <i>Ager</i> <sup>-/-</sup><br>ND Recipient |
| Body Weight (g)           | 29±0.3                                              | 28±0.3             | 27±0.3*                                    |
| Glucose (mg/dL)           | 168±2                                               | 162±3              | 146±4* <sup>^</sup>                        |
| Total Cholesterol (mg/dL) | 1,012±16                                            | 110±6*             | 86±8*                                      |
| Triglyceride (mg/dL)      | 62±2                                                | 27±2*              | 23±2*                                      |

# receives Western Diet; all other groups receive standard chow diet

ND = Non-Diabetic

Values represent Mean±SEM

\* Donor versus Recipient

<sup>^</sup> WT recipient versus *Ager*<sup>-/-</sup> recipient

\*, <sup>^</sup> *P*<0.05

**Table S1B. Correlation between Atherosclerotic Lesion Area (H&E staining) and Total Cholesterol Levels in Non-diabetic Donor and Non-diabetic Recipient Mice.**

| <u>Genotype/Condition</u>            | <u>Correlation Coefficient/P-value</u> |
|--------------------------------------|----------------------------------------|
| <i>Ldlr</i> <sup>-/-</sup> Donor     | 0.56/0.09                              |
| WT Recipient                         | 0.66/0.04*                             |
| <i>Ager</i> <sup>-/-</sup> Recipient | 0.61/0.058                             |

\* *P*<0.05

**Table S2. Number of Reactome Gene Sets for each comparison with CAMERA (FDR≤0.05).**

| <b>Comparison</b>                                                                                                  | <b>Highly ranked<br/>Reactome Gene</b> |                    |
|--------------------------------------------------------------------------------------------------------------------|----------------------------------------|--------------------|
|                                                                                                                    | <b>Sets</b>                            | <b>Detailed in</b> |
| C1 WT Recipient <b>versus</b> <i>Ldlr</i> <sup>-/-</sup> Donor                                                     | 12                                     | Table S3           |
| C2 <i>Ager</i> <sup>-/-</sup> Recipient <b>versus</b> <i>Ldlr</i> <sup>-/-</sup> Donor                             | 16                                     | Table S4           |
| C3 <i>Ldlr</i> <sup>-/-</sup> Donor→ <i>Ager</i> <sup>-/-</sup> <b>versus</b> <i>Ldlr</i> <sup>-/-</sup> Donor→ WT | 119                                    | Table S5           |
| C4 <i>Ager</i> <sup>-/-</sup> Recipient <b>versus</b> WT Recipient                                                 | 4                                      | Table 4            |



**Table S3. Reactome Gene sets in a WT recipient environment vs. untransplanted *Ldlr*<sup>-/-</sup> donor using CAMERA with a FDR≤0.05 (Comparison 1, C1).**

| <b>Gene set</b>                                  | <b>Direction</b> | <b>P-value</b> | <b>FDR</b> |
|--------------------------------------------------|------------------|----------------|------------|
| Glucose Metabolism                               | ↑                | 1.4E-07        | 8.0E-05    |
| Complement Cascade                               | ↓                | 1.8E-07        | 8.4E-05    |
| Glycolysis                                       | ↑                | 9.1E-05        | 4.8E-05    |
| Activation of Chaperone Genes by Atf6 Alpha      | ↓                | 2.2E-05        | 4.0E-03    |
| Gluconeogenesis                                  | ↑                | 3.2E-05        | 5.0E-03    |
| Activation of Chaperones by Atf6 Alpha           | ↓                | 6.7E-05        | 9.1E-03    |
| Translocation of Zap 70 to Immunological Synapse | ↓                | 1.4E-04        | 0.017      |
| Perk Regulated Gene Expression                   | ↓                | 1.7E-04        | 0.018      |
| Regulation of Complement Cascade                 | ↓                | 2.3E-04        | 0.021      |
| Phosphorylation of Cd3 and TCR Zeta Chains       | ↓                | 3.5E-04        | 0.030      |
| Interaction between L1 and Ankyrins              | ↓                | 4.2E-04        | 0.031      |
| Chylomicron Mediated Lipid Transport             | ↑                | 8.0E-04        | 0.049      |

**Table S4. Reactome Gene sets in recipient macrophages devoid of *Ager* environment vs. untransplanted *Ldlr*<sup>-/-</sup> donor using CAMERA with a FDR≤0.05 (Comparison 2, C2).**

| <b>Gene set</b>                                                            | <b>Direction</b> | <b>P-Value</b> | <b>FDR</b> |
|----------------------------------------------------------------------------|------------------|----------------|------------|
| Glycolysis                                                                 | ↑                | 2.3E-11        | 1.8E-08    |
| Glucose Metabolism                                                         | ↑                | 4.6E-09        | 2.4E-06    |
| Complement Cascade                                                         | ↓                | 8.5E-07        | 2.2E-04    |
| Translocation of Zap 70 To Immunological Synapse                           | ↓                | 1.5E-06        | 3.6E-04    |
| Gluconeogenesis                                                            | ↑                | 7.2E-06        | 1.1E-03    |
| Phosphorylation of Cd3 and Tcr Zeta Chains                                 | ↓                | 9.9E-06        | 1.3E-03    |
| Interferon Gamma Signaling                                                 | ↓                | 2.4E-05        | 2.5E-03    |
| Activation of Chaperone Genes by Atf6 Alpha                                | ↓                | 1.8E-04        | 0.012      |
| Synthesis And Interconversion of Nucleotide Di and Triphosphates           | ↑                | 2.0E-04        | 0.012      |
| Generation Of Second Messenger Molecules                                   | ↓                | 2.5E-04        | 0.014      |
| Interferon Alpha Beta Signaling                                            | ↓                | 2.7E-04        | 0.015      |
| Perk Regulated Gene Expression                                             | ↓                | 2.7E-04        | 0.015      |
| Metabolism of Nucleotides                                                  | ↑                | 2.9E-04        | 0.015      |
| Activation of Chaperones by Atf6 Alpha                                     | ↓                | 3.0E-04        | 0.015      |
| Regulation of Complement Cascade                                           | ↓                | 3.9E-04        | 0.019      |
| Nef Mediated Downregulation of MHC Class I Complex Cell Surface Expression | ↓                | 1.3E-03        | 0.045      |

**Table S5. Reactome Gene sets in *Ager*<sup>-/-</sup> Donor macrophages vs. WT recipient environment using CAMERA with a FDR≤0.05 (Comparison 3, C3).**

| <b>Gene set</b>                                                                                                  | <b>Direction</b> | <b>P-value</b> | <b>FDR</b> |
|------------------------------------------------------------------------------------------------------------------|------------------|----------------|------------|
| Peptide Chain Elongation                                                                                         | ↑                | 1.9E-15        | 9.0E-12    |
| Influenza Viral RNA Transcription                                                                                | ↑                | 2.6E-14        | 3.0E-11    |
| Srp dependent Cotranslational Protein Targeting to Membrane                                                      | ↑                | 6.1E-13        | 5.7E-10    |
| 3'UTR Mediated Translational Regulation                                                                          | ↑                | 3.9E-12        | 3.1E-09    |
| Respiratory Electron Transport ATP Synthesis by Chemiosmotic coupling And Heat Production by Uncoupling Proteins | ↑                | 9.3E-12        | 6.3E-09    |
| Respirator Electron Transport                                                                                    | ↑                | 3.8E-11        | 2.3E-08    |
| Nonsense-Mediated Decay Enhanced by the Exon Junction Complex                                                    | ↑                | 4.4E-11        | 3.2E-08    |
| Influenza Life Cycle                                                                                             | ↑                | 1.8E-10        | 6.4E-08    |
| Translation                                                                                                      | ↑                | 6.7E-10        | 1.7E-07    |
| Collagen Formation                                                                                               | ↓                | 8.3E-10        | 2.0E-07    |
| Formation of the Ternary Complex and Subsequently the 43S Complex                                                | ↑                | 2.7E-09        | 4.6E-07    |
| Extracellular Matrix Organization                                                                                | ↓                | 1.3E-08        | 1.7E-06    |
| TCA Cycle and Respiratory Electron Transport                                                                     | ↑                | 2.9E-08        | 3.7E-06    |
| Metabolism of mRNA                                                                                               | ↑                | 1.8E-07        | 1.4E-05    |
| Activation of the mRNA Binding of the Cap Binding Complex and Eifs and Subsequent Binding to 43S                 | ↑                | 5.4E-07        | 3.1E-05    |
| Metabolism of mRNA                                                                                               | ↑                | 6.0E-07        | 3.3E-05    |
| NCAM1 interactions                                                                                               | ↓                | 1.0E-06        | 4.6E-05    |
| M G1 Transition                                                                                                  | ↑                | 5.8E-06        | 1.8E-04    |
| Assembly of the Pre Replicative Complex                                                                          | ↑                | 6.6E-06        | 2.0E-04    |
| Yap1 and Wwtr1 Stimulated Gene Expression                                                                        | ↓                | 9.7E-06        | 2.7E-04    |
| Cdt1 Association with the Cdc6 Orc Origin Complex                                                                | ↑                | 1.5E-05        | 3.7E-04    |
| Autodegradation of the E3 Ubiquitin Ligase Cop1                                                                  | ↑                | 1.7E-05        | 4.0E-04    |
| Cdk Mediated Phosphorylation and Removal of Cdc6                                                                 | ↑                | 2.7E-05        | 6.0E-04    |
| Synthesis of DNA                                                                                                 | ↑                | 3.1E-05        | 6.7E-04    |
| Platelet Adhesion to Exposed Collagen                                                                            | ↓                | 3.8E-05        | 7.7E-04    |
| Orc1 Removal from Chromatin                                                                                      | ↑                | 4.1E-05        | 8.2E-04    |
| Regulation of Mitotic Cell Cycle                                                                                 | ↑                | 5.0E-05        | 9.6E-04    |
| Scf Beta Trep Mediated Degradation of Emi1                                                                       | ↑                | 6.3E-05        | 1.2E-03    |
| Integrin Cell Surface Interactions Apc C Cdc20 Mediated                                                          | ↓                | 6.4E-05        | 1.2E-03    |
| Degradation of Mitotic Proteins                                                                                  | ↑                | 6.6E-05        | 1.2E-03    |
| Signaling by BMP                                                                                                 | ↓                | 6.9E-05        | 1.3E-03    |
| Vif Mediated Degradation of Apobec3G                                                                             | ↑                | 7.2E-05        | 1.3E-03    |
| S Phase                                                                                                          | ↑                | 7.4E-05        | 1.3E-03    |
| Scfskp2 Mediated Degradation of P27P21                                                                           | ↑                | 8.5E-05        | 1.5E-03    |
| Il6 Signaling                                                                                                    | ↓                | 1.1E-04        | 1.8E-03    |
| ApcC Cdh1 Mediated Degradation of Cdc20 and Other Apc C Cdh1 targeted proteins in Late Mitosis Early G1          | ↑                | 1.2E-04        | 2.0E-03    |
| RNA Pol1 Promoter Opening                                                                                        | ↑                | 1.3E-04        | 2.0E-03    |
| P53 Dependent G1 S DNA Damage Checkpoint                                                                         | ↑                | 1.5E-04        | 2.3E-03    |

|                                                                                                             |   |         |         |
|-------------------------------------------------------------------------------------------------------------|---|---------|---------|
| Mitotic G1 S Phases                                                                                         | ↑ | 1.6E-04 | 2.4E-03 |
| NCAM signaling for neurite Outgrowth                                                                        | ↓ | 1.6E-04 | 2.5E-03 |
| G1 S Transition                                                                                             | ↑ | 1.8E-04 | 2.7E-03 |
| Meiotic Recombination                                                                                       | ↑ | 1.9E-04 | 2.7E-03 |
| RNA Pol I Transcription                                                                                     | ↑ | 2.0E-04 | 2.8E-03 |
| Formation of ATP by Chemiosmotic Coupling                                                                   | ↑ | 2.0E-04 | 2.8E-03 |
| RNA Pol I RNA Pol III and Mitochondrial Transcription                                                       | ↑ | 2.0E-04 | 2.8E-03 |
| Autodegradation of Cdh1 by Cdh1 Apc C                                                                       | ↑ | 2.2E-04 | 3.0E-03 |
| P53 Dependent G1 DNA Damage Response                                                                        | ↑ | 2.2E-04 | 3.0E-03 |
| Mitotic M M G1 Phases                                                                                       | ↑ | 2.5E-04 | 3.3E-03 |
| DNA Replication                                                                                             | ↑ | 2.5E-04 | 3.4E-03 |
| Packaging of Telomere Ends                                                                                  | ↑ | 2.9E-04 | 3.8E-03 |
| Rora Activates Circadian Expression                                                                         | ↓ | 3.0E-04 | 3.8E-03 |
| Destabilization of mRNA by Auf1 Hnrnp D0                                                                    | ↑ | 3.2E-04 | 4.0E-03 |
| Circadian Expression of Expression By Rev Erba                                                              | ↓ | 3.5E-04 | 4.3E-03 |
| DNA Repair                                                                                                  | ↑ | 3.6E-04 | 4.4E-03 |
| Signaling by FGFR mutants                                                                                   | ↓ | 3.9E-04 | 4.6E-03 |
| Amyloids                                                                                                    | ↑ | 4.1E-04 | 4.8E-03 |
| Cyclin E associated events during G1 S Transition                                                           | ↑ | 5.0E-04 | 5.6E-03 |
| Formation of the HIV1 Early Elongation Complex                                                              | ↑ | 5.2E-04 | 5.8E-03 |
| Regulation of Ornithine Decarboxylase Odc                                                                   | ↑ | 5.6E-04 | 6.0E-03 |
| Fanconi Anemia pathway                                                                                      | ↑ | 6.7E-04 | 6.8E-03 |
| Telomere Maintenance                                                                                        | ↑ | 7.8E-04 | 7.7E-03 |
| Formation of RNA Poli II Elongation complex                                                                 | ↑ | 8.0E-04 | 7.9E-03 |
| Apoptosis Induced DNA Fragmentation                                                                         | ↑ | 8.2E-04 | 8.1E-03 |
| Signal Attenuation                                                                                          | ↓ | 8.2E-04 | 8.1E-03 |
| Transcription                                                                                               | ↑ | 9.1E-04 | 8.7E-03 |
| Signaling by PDGF                                                                                           | ↓ | 9.2E-04 | 8.7E-03 |
| Signaling by WNT                                                                                            | ↑ | 9.6E-04 | 9.0E-03 |
| Elongation Arrest and Recovery                                                                              | ↑ | 1.4E-03 | 0.01    |
| BMAL1 Clock NPAS2 Activates Circadian Expression                                                            | ↓ | 1.5E-03 | 0.01    |
| Cross Presentation of Soluble Antigens Endosomes                                                            | ↑ | 1.5E-03 | 0.01    |
| Regulation of Insulin Like Growth Factor Igf activity by insulin like growth factor binding proteins Igfbps | ↓ | 1.5E-03 | 0.01    |
| Regulation of apoptosis                                                                                     | ↑ | 1.6E-03 | 0.01    |
| HIV Life Cycle                                                                                              | ↑ | 2.1E-03 | 0.02    |
| Terminatoin of O glycan Biosynthesis                                                                        | ↓ | 2.1E-03 | 0.02    |
| Abortive Elongation of HIV1 Transcript in the absence of TAT                                                | ↑ | 2.1E-03 | 0.02    |
| MRNA splicing minor pathway                                                                                 | ↑ | 2.2E-03 | 0.02    |
| Meiosis                                                                                                     | ↑ | 2.3E-03 | 0.02    |
| Notch Hlh Transcription Pathway                                                                             | ↓ | 2.4E-03 | 0.02    |
| Pre Notch Processing in Golgi                                                                               | ↓ | 2.4E-03 | 0.02    |
| Formation of Transcription Coupled Ner Tc Ner Repair Complex                                                | ↑ | 2.4E-03 | 0.02    |
| Signaling by FGFR1 mutants                                                                                  | ↓ | 2.6E-03 | 0.02    |
| RNA Pol Ii Pre Transcription Events                                                                         | ↑ | 2.7E-03 | 0.02    |

|                                                                     |   |         |      |
|---------------------------------------------------------------------|---|---------|------|
| ER Phagosome Pathway                                                | ↑ | 2.8E-03 | 0.02 |
| MRNA Capping                                                        | ↑ | 2.8E-03 | 0.02 |
| Viral Messenger RNA synthesis                                       | ↑ | 3.0E-03 | 0.02 |
| Late Phase of HIV Life Cycle                                        | ↑ | 3.3E-03 | 0.02 |
| Shc mediated cascade                                                | ↓ | 3.3E-03 | 0.02 |
| Cell Surface Interactions at the Vascular Wall                      | ↓ | 3.9E-03 | 0.03 |
| Phase 1 functionalization of compounds                              | ↓ | 4.1E-03 | 0.03 |
| RNA Pol II Transcription Pre Initiation and Promoter Opening        | ↑ | 4.4E-03 | 0.03 |
| Axon Guidance                                                       | ↓ | 4.4E-03 | 0.03 |
| Developmental Biology                                               | ↓ | 4.5E-03 | 0.03 |
| Association of Licensing Factors with Pre Replicative Complex       | ↑ | 4.5E-03 | 0.03 |
| Role of second messenger in Netrin 1 signaling                      | ↓ | 4.5E-03 | 0.03 |
| Nuclear Receptor Transcription Pathway                              | ↓ | 4.8E-03 | 0.03 |
| Gpvi Mediated Activation Cascade                                    | ↓ | 4.9E-03 | 0.03 |
| Keratan sulfate biosynthesis                                        | ↓ | 5.4E-03 | 0.03 |
| Meiotic synapsis                                                    | ↑ | 5.5E-03 | 0.03 |
| Activated point mutants of FGFR2                                    | ↓ | 5.7E-03 | 0.03 |
| FGFR ligand binding and activation                                  | ↓ | 5.7E-03 | 0.03 |
| O Linked glycosylation of mucins                                    | ↓ | 5.7E-03 | 0.03 |
| Transcription coupled Ner Tc Ner                                    | ↑ | 5.9E-03 | 0.04 |
| PI3K Events in Erbb2 signaling                                      | ↓ | 6.0E-03 | 0.04 |
| Cell cycle checkpoints                                              | ↑ | 6.1E-03 | 0.04 |
| A Tetrasaccharide Linker Sequence is Required for GAG synthesis     | ↓ | 6.1E-03 | 0.04 |
| RNA Pol III Transcription from Type 3 promoter                      | ↑ | 6.2E-03 | 0.04 |
| Peptide ligand binding receptors                                    | ↓ | 6.3E-03 | 0.04 |
| Regulation of MRNA Stability by Proteins that bind Au Rich elements | ↑ | 6.5E-03 | 0.04 |
| Cell Cycle Mitotic                                                  | ↑ | 6.9E-03 | 0.04 |
| Amino Acid and Oligopeptide Slc Transporters                        | ↓ | 7.1E-03 | 0.04 |
| Cell Cycle                                                          | ↑ | 7.2E-03 | 0.04 |
| PI3K Events in Erbb4 Signaling                                      | ↓ | 7.4E-03 | 0.04 |
| Metabolism of Proteins                                              | ↑ | 7.5E-03 | 0.04 |
| Traf6 Mediated IRF7 Activation                                      | ↓ | 7.9E-03 | 0.04 |
| Nucleotide Excision Factor                                          | ↑ | 7.9E-03 | 0.04 |
| Amino Acid Transport Across The Plasma Membrane                     | ↓ | 8.1E-03 | 0.04 |
| Deposition of new Cenpa Containing Nucleosomes at the centromere    | ↑ | 9.0E-03 | 0.05 |
| Signaling by FGFR1 Fusion Mutants                                   | ↓ | 9.0E-03 | 0.05 |
| TRAF3 Dependent IRF4 Activation Pathway                             | ↓ | 9.5E-03 | 0.05 |



**Table S6. Number of Differentially Expressed Genes by Distinct Criteria**

| <b><u>Comparison</u></b>                                                     | <b><u>FDR≤0.05</u></b> | <b><u>p≤0.001, FDR≤0.2</u></b> | <b><u>Detail list in</u></b> |
|------------------------------------------------------------------------------|------------------------|--------------------------------|------------------------------|
| C1 WT Recipient vs. <i>Ldlr</i> <sup>-/-</sup> Donor                         | 219                    | 268                            | Table S7                     |
| C2 <i>Ager</i> <sup>-/-</sup> Recipient vs. <i>Ldlr</i> <sup>-/-</sup> Donor | 489                    | 426                            | Table S8                     |
| C3 <i>Ager</i> <sup>-/-</sup> vs. WT on Donor                                | 0                      | 0                              |                              |
| C4 <i>Ager</i> <sup>-/-</sup> Recipient vs. WT Recipient                     | 4                      | 11                             | Table S9                     |

**Table S7. Differentially Expressed Genes on the WT Recipient macrophages vs. *Ldlr*<sup>-/-</sup> Not Transplanted macrophages.** Comparison 1 (C1), p≤0.001 and FDR≤0.2.

| <u>SYMBOL</u> | <u>GENE NAME</u>                                                                                              | <u>log2FC</u> | <u>P.Value</u> | <u>fd</u> |
|---------------|---------------------------------------------------------------------------------------------------------------|---------------|----------------|-----------|
| Cd209b        | CD209b antigen                                                                                                | -10.49        | 2.8E-08        | 2.5E-04   |
| Muc11         | mucin-like 1                                                                                                  | -8.86         | 2.9E-08        | 2.5E-04   |
| C6            | complement component 6                                                                                        | -10.26        | 5.7E-08        | 2.6E-04   |
| Hspa1a        | heat shock protein 1A                                                                                         | -2.62         | 6.2E-08        | 2.6E-04   |
| Fgf9          | fibroblast growth factor 9                                                                                    | -7.45         | 7.4E-08        | 2.6E-04   |
| Hif1a         | hypoxia inducible factor 1, alpha subunit                                                                     | 2.37          | 1.1E-07        | 3.0E-04   |
| Enpep         | glutamyl aminopeptidase                                                                                       | -9.28         | 1.2E-07        | 3.0E-04   |
| Arg1          | arginase, liver                                                                                               | 7.85          | 2.6E-07        | 5.6E-04   |
| Tmod1         | tropomodulin 1                                                                                                | -9.16         | 3.6E-07        | 6.2E-04   |
| Dnajb1        | DnaJ heat shock protein family (Hsp40) member B1                                                              | -3.15         | 3.6E-07        | 6.2E-04   |
| C2            | complement component 2 (within H-2S)                                                                          | -7.83         | 3.9E-07        | 6.2E-04   |
| Gm45138       | NA                                                                                                            | -8.53         | 4.5E-07        | 6.5E-04   |
| P3h2          | prolyl 3-hydroxylase 2                                                                                        | -9.51         | 6.1E-07        | 7.5E-04   |
| Vegfa         | vascular endothelial growth factor A                                                                          | 3.65          | 6.2E-07        | 7.5E-04   |
| Cd93          | CD93 antigen                                                                                                  | 2.15          | 6.5E-07        | 7.5E-04   |
| Gm4524        | predicted gene 4524                                                                                           | -7.36         | 1.0E-06        | 1.1E-03   |
| Thbs1         | thrombospondin 1                                                                                              | 3.48          | 1.2E-06        | 1.2E-03   |
| Hpgd          | hydroxyprostaglandin dehydrogenase 15 (NAD)                                                                   | -3.16         | 1.3E-06        | 1.2E-03   |
| Jup           | junction plakoglobin                                                                                          | -2.67         | 1.4E-06        | 1.3E-03   |
| Themis        | thymocyte selection associated                                                                                | -7.62         | 1.7E-06        | 1.4E-03   |
| Dnaja1        | DnaJ heat shock protein family (Hsp40) member A1                                                              | -1.77         | 2.5E-06        | 2.0E-03   |
| Gm26714       | NA                                                                                                            | -6.09         | 3.5E-06        | 2.6E-03   |
| Hsph1         | heat shock 105kDa/110kDa protein 1                                                                            | -2.22         | 3.6E-06        | 2.6E-03   |
| Ak4           | adenylate kinase 4                                                                                            | 6.86          | 3.7E-06        | 2.6E-03   |
| Tox           | thymocyte selection-associated high mobility group box                                                        | -6.52         | 3.7E-06        | 2.6E-03   |
| Cdr2          | cerebellar degeneration-related 2<br>tetratricopeptide repeat, ankyrin repeat and coiled-coil<br>containing 2 | -4.20         | 4.8E-06        | 3.2E-03   |
| Tanc2         |                                                                                                               | -2.34         | 5.7E-06        | 3.7E-03   |
| Spats2l       | spermatogenesis associated, serine-rich 2-like                                                                | -6.70         | 7.4E-06        | 4.5E-03   |
| Cd209f        | CD209f antigen                                                                                                | -8.43         | 7.7E-06        | 4.5E-03   |
| Aldoa         | aldolase A, fructose-bisphosphate                                                                             | 1.85          | 7.8E-06        | 4.5E-03   |
| Thrb          | thyroid hormone receptor beta                                                                                 | -7.25         | 8.5E-06        | 4.8E-03   |
| Cd209d        | CD209d antigen                                                                                                | -6.70         | 9.4E-06        | 5.0E-03   |
| Tshz3         | teashirt zinc finger family member 3                                                                          | -7.67         | 9.7E-06        | 5.0E-03   |
| Cd209g        | CD209g antigen                                                                                                | -8.85         | 1.0E-05        | 5.0E-03   |
| Pmp22         | peripheral myelin protein 22                                                                                  | -3.46         | 1.1E-05        | 5.0E-03   |
| Hspa1b        | heat shock protein 1B                                                                                         | -2.81         | 1.1E-05        | 5.0E-03   |
| AC159502.1    | NA                                                                                                            | 5.86          | 1.1E-05        | 5.0E-03   |
| C4b           | complement component 4B (Chido blood group)                                                                   | -2.95         | 1.1E-05        | 5.0E-03   |
| Cd209e        | CD209e antigen<br>macrophage galactose N-acetyl-galactosamine specific<br>lectin 2                            | -6.51         | 1.2E-05        | 5.3E-03   |
| Mgl2          |                                                                                                               | -3.91         | 1.2E-05        | 5.4E-03   |
| Hsp90aa1      | heat shock protein 90, alpha (cytosolic), class A member 1                                                    | -1.62         | 1.4E-05        | 6.0E-03   |

|               |                                                                                           |       |         |         |
|---------------|-------------------------------------------------------------------------------------------|-------|---------|---------|
| Klhl13        | kelch-like 13                                                                             | -6.72 | 1.5E-05 | 6.2E-03 |
| Micall2       | MICAL-like 2                                                                              | 6.20  | 1.5E-05 | 6.2E-03 |
| Bst1          | bone marrow stromal cell antigen 1                                                        | 1.77  | 1.7E-05 | 6.7E-03 |
| Saa3          | serum amyloid A 3                                                                         | 6.11  | 1.9E-05 | 7.5E-03 |
| Cd81          | CD81 antigen                                                                              | -2.21 | 2.0E-05 | 7.5E-03 |
| Lck           | lymphocyte protein tyrosine kinase                                                        | -6.38 | 2.2E-05 | 7.7E-03 |
| Ank2          | ankyrin 2, brain                                                                          | -5.99 | 2.2E-05 | 7.7E-03 |
| Epor          | erythropoietin receptor                                                                   | -6.48 | 2.3E-05 | 7.7E-03 |
| Wnk2          | WNK lysine deficient protein kinase 2                                                     | 5.94  | 2.3E-05 | 7.7E-03 |
| Camk4         | calcium/calmodulin-dependent protein kinase IV                                            | -6.62 | 2.4E-05 | 7.7E-03 |
| Gfra2         | glial cell line derived neurotrophic factor family receptor alpha 2                       | -6.52 | 2.4E-05 | 7.7E-03 |
| Creb5         | cAMP responsive element binding protein 5                                                 | -1.33 | 2.4E-05 | 7.7E-03 |
| Mb21d2        | Mab-21 domain containing 2                                                                | -6.20 | 2.4E-05 | 7.7E-03 |
| Sema6d        | sema domain, transmembrane domain (TM), and cytoplasmic domain, (semaphorin) 6D           | -3.73 | 2.5E-05 | 7.7E-03 |
| AC108401.1    | NA                                                                                        | 7.21  | 2.5E-05 | 7.7E-03 |
| Ephx1         | epoxide hydrolase 1, microsomal                                                           | -3.82 | 2.6E-05 | 7.7E-03 |
| Ndst1         | N-deacetylase/N-sulfotransferase (heparan glucosaminyl) 1                                 | 2.13  | 2.6E-05 | 7.7E-03 |
| Slamf9        | SLAM family member 9                                                                      | -2.11 | 2.6E-05 | 7.7E-03 |
| Cd8a          | CD8 antigen, alpha chain                                                                  | -6.02 | 2.6E-05 | 7.7E-03 |
| F830016B08Rik | RIKEN cDNA F830016B08 gene                                                                | -5.27 | 2.8E-05 | 8.0E-03 |
| Lifr          | leukemia inhibitory factor receptor                                                       | -1.98 | 2.8E-05 | 8.0E-03 |
| Jun           | jun proto-oncogene                                                                        | -1.38 | 3.0E-05 | 8.2E-03 |
| Dst           | dystonin                                                                                  | -2.18 | 3.0E-05 | 8.2E-03 |
| Rai14         | retinoic acid induced 14                                                                  | 2.31  | 3.1E-05 | 8.2E-03 |
| Ldlr          | low density lipoprotein receptor                                                          | 3.96  | 3.1E-05 | 8.2E-03 |
| Lilra5        | leukocyte immunoglobulin-like receptor, subfamily A (with TM domain), member 5            | -4.33 | 3.2E-05 | 8.2E-03 |
| Itgam         | integrin alpha M                                                                          | 0.98  | 3.5E-05 | 8.8E-03 |
| B430306N03Rik | RIKEN cDNA B430306N03 gene                                                                | 1.93  | 3.5E-05 | 8.9E-03 |
| Gm38340       | NA                                                                                        | -6.36 | 3.6E-05 | 8.9E-03 |
| Naip1         | NLR family, apoptosis inhibitory protein 1                                                | 6.23  | 3.7E-05 | 9.1E-03 |
| Diras2        | DIRAS family, GTP-binding RAS-like 2                                                      | -6.14 | 3.9E-05 | 9.3E-03 |
| Kcnn3         | potassium intermediate/small conductance calcium-activated channel, subfamily N, member 3 | 6.71  | 4.5E-05 | 0.01    |
| Ust           | uronyl-2-sulfotransferase                                                                 | -3.00 | 5.1E-05 | 0.01    |
| Zbtb10        | zinc finger and BTB domain containing 10                                                  | -2.33 | 5.1E-05 | 0.01    |
| Pla2g2d       | phospholipase A2, group IID                                                               | -8.70 | 5.2E-05 | 0.01    |
| Spp1          | secreted phosphoprotein 1                                                                 | 3.10  | 5.5E-05 | 0.01    |
| Gm42972       | NA                                                                                        | -6.18 | 5.6E-05 | 0.01    |
| Pkm           | pyruvate kinase, muscle                                                                   | 1.54  | 5.7E-05 | 0.01    |
| Tslp          | thymic stromal lymphopoietin                                                              | -5.85 | 5.8E-05 | 0.01    |
| Tns1          | tensin 1                                                                                  | -2.51 | 5.8E-05 | 0.01    |
| Lif           | leukemia inhibitory factor                                                                | 5.60  | 5.9E-05 | 0.01    |
| Abcc1         | ATP-binding cassette, sub-family C (CFTR/MRP), member 1                                   | 1.13  | 6.0E-05 | 0.01    |
| Ankrd37       | ankyrin repeat domain 37                                                                  | 6.00  | 6.2E-05 | 0.01    |

|               |                                                                        |       |         |      |
|---------------|------------------------------------------------------------------------|-------|---------|------|
| Gpr155        | G protein-coupled receptor 155                                         | -2.23 | 6.4E-05 | 0.01 |
| AC122426.1    | NA                                                                     | -5.74 | 6.5E-05 | 0.01 |
| Hs3st3a1      | heparan sulfate (glucosamine) 3-O-sulfotransferase 3A1                 | -5.41 | 6.9E-05 | 0.01 |
| Chp2          | calcineurin-like EF hand protein 2                                     | -5.76 | 6.9E-05 | 0.01 |
| Igf2r         | insulin-like growth factor 2 receptor                                  | 1.83  | 7.1E-05 | 0.01 |
| Ctsd          | cathepsin D                                                            | 1.71  | 7.1E-05 | 0.01 |
| Prtn3         | proteinase 3                                                           | 5.53  | 7.1E-05 | 0.01 |
| A4galt        | alpha 1,4-galactosyltransferase                                        | -6.58 | 7.1E-05 | 0.01 |
| Ldha          | lactate dehydrogenase A                                                | 1.59  | 7.2E-05 | 0.01 |
| Rspo1         | R-spondin 1                                                            | 5.16  | 7.4E-05 | 0.01 |
| Lat           | linker for activation of T cells                                       | -7.68 | 7.6E-05 | 0.01 |
| Slc16a10      | solute carrier family 16 (monocarboxylic acid transporters), member 10 | 1.14  | 8.0E-05 | 0.01 |
| Ctse          | cathepsin E                                                            | 3.55  | 8.1E-05 | 0.01 |
| Dnm1          | dynamamin 1                                                            | -4.82 | 8.2E-05 | 0.01 |
| Rtn4rl1       | reticulon 4 receptor-like 1                                            | -4.21 | 8.4E-05 | 0.01 |
| Hilpda        | hypoxia inducible lipid droplet associated                             | 2.77  | 8.5E-05 | 0.01 |
| Arhgef5       | Rho guanine nucleotide exchange factor (GEF) 5                         | -6.54 | 8.5E-05 | 0.01 |
| Ehd3          | EH-domain containing 3                                                 | -6.07 | 8.7E-05 | 0.01 |
| Adam8         | a disintegrin and metallopeptidase domain 8                            | 2.01  | 8.7E-05 | 0.01 |
| Fxyd2         | FXDY domain-containing ion transport regulator 2                       | -4.96 | 9.0E-05 | 0.02 |
| Ighm          | immunoglobulin heavy constant mu                                       | -1.88 | 9.2E-05 | 0.02 |
| Pfkl          | phosphofructokinase, liver, B-type                                     | 2.17  | 1.0E-04 | 0.02 |
| Raet1e        | retinoic acid early transcript 1E                                      | 4.93  | 1.0E-04 | 0.02 |
| Sulf2         | sulfatase 2                                                            | -1.25 | 1.0E-04 | 0.02 |
| Adamtsl5      | ADAMTS-like 5                                                          | -5.28 | 1.0E-04 | 0.02 |
| Ikbke         | inhibitor of kappaB kinase epsilon                                     | 2.74  | 1.1E-04 | 0.02 |
| Tppp          | tubulin polymerization promoting protein                               | -6.22 | 1.2E-04 | 0.02 |
| Il1rl1        | interleukin 1 receptor-like 1                                          | -4.03 | 1.2E-04 | 0.02 |
| Epcam         | epithelial cell adhesion molecule                                      | -5.58 | 1.3E-04 | 0.02 |
| Cd163         | CD163 antigen                                                          | -3.38 | 1.3E-04 | 0.02 |
| Slc39a4       | solute carrier family 39 (zinc transporter), member 4                  | 5.94  | 1.3E-04 | 0.02 |
| Mat2a         | methionine adenosyltransferase II, alpha                               | -1.21 | 1.3E-04 | 0.02 |
| Siglech       | sialic acid binding Ig-like lectin H                                   | -6.21 | 1.4E-04 | 0.02 |
| 1810011O10Rik | RIKEN cDNA 1810011O10 gene                                             | -7.32 | 1.5E-04 | 0.02 |
| Cd6           | CD6 antigen                                                            | -5.19 | 1.6E-04 | 0.02 |
| Gm4951        | predicted gene 4951                                                    | -4.99 | 1.6E-04 | 0.02 |
| Prdx5         | peroxiredoxin 5                                                        | 2.21  | 1.7E-04 | 0.02 |
| Snx18         | sorting nexin 18                                                       | 1.07  | 1.7E-04 | 0.02 |
| Fam20c        | family with sequence similarity 20, member C                           | 2.56  | 1.8E-04 | 0.02 |
| AF529169      | cDNA sequence AF529169                                                 | -5.40 | 1.8E-04 | 0.03 |
| Fabp7         | fatty acid binding protein 7, brain                                    | 5.58  | 1.8E-04 | 0.03 |
| Ablim3        | actin binding LIM protein family, member 3                             | -5.81 | 1.8E-04 | 0.03 |
| Mxi1          | MAX interactor 1, dimerization protein                                 | 1.38  | 1.9E-04 | 0.03 |
| Lyve1         | lymphatic vessel endothelial hyaluronan receptor 1                     | -4.80 | 1.9E-04 | 0.03 |
| Eno1          | enolase 1, alpha non-neuron                                            | 1.46  | 1.9E-04 | 0.03 |

|               |                                                                                                                                              |       |         |      |
|---------------|----------------------------------------------------------------------------------------------------------------------------------------------|-------|---------|------|
| Gm26686       | NA                                                                                                                                           | 5.30  | 2.0E-04 | 0.03 |
| C230031I18Rik | RIKEN cDNA C230031I18 gene                                                                                                                   | -5.49 | 2.0E-04 | 0.03 |
| Gm8995        | predicted gene 8995                                                                                                                          | -1.04 | 2.0E-04 | 0.03 |
| Lix1          | limb and CNS expressed 1                                                                                                                     | -4.83 | 2.0E-04 | 0.03 |
| Plin2         | perilipin 2                                                                                                                                  | 1.19  | 2.0E-04 | 0.03 |
| Plin2         | perilipin 2                                                                                                                                  | 1.19  | 2.0E-04 | 0.03 |
| Atf3          | activating transcription factor 3                                                                                                            | -1.11 | 2.1E-04 | 0.03 |
| Negr1         | neuronal growth regulator 1                                                                                                                  | -5.10 | 2.1E-04 | 0.03 |
| Dpyd          | dihydropyrimidine dehydrogenase                                                                                                              | -4.51 | 2.1E-04 | 0.03 |
| Psd3          | pleckstrin and Sec7 domain containing 3                                                                                                      | -2.15 | 2.1E-04 | 0.03 |
| Vsig4         | V-set and immunoglobulin domain containing 4 solute carrier family 2 (facilitated glucose transporter), member 1                             | -6.44 | 2.1E-04 | 0.03 |
| Slc2a1        | Slc2a1                                                                                                                                       | 2.46  | 2.2E-04 | 0.03 |
| Kitl          | kit ligand                                                                                                                                   | -4.47 | 2.2E-04 | 0.03 |
| Tgm2          | transglutaminase 2, C polypeptide                                                                                                            | 1.70  | 2.2E-04 | 0.03 |
| Egln3         | egl-9 family hypoxia-inducible factor 3                                                                                                      | 6.93  | 2.2E-04 | 0.03 |
| Ifi2712a      | interferon, alpha-inducible protein 27 like 2A 5-aminoimidazole-4-carboxamide ribonucleotide formyltransferase/IMP cyclohydrolase pseudogene | -1.99 | 2.2E-04 | 0.03 |
| Gm15550       | Gm15550                                                                                                                                      | -5.98 | 2.3E-04 | 0.03 |
| Tmem176a      | transmembrane protein 176A                                                                                                                   | -1.32 | 2.3E-04 | 0.03 |
| H2-Q6         | histocompatibility 2, Q region locus 6                                                                                                       | -2.83 | 2.3E-04 | 0.03 |
| Zcchc14       | zinc finger, CCHC domain containing 14                                                                                                       | -2.62 | 2.4E-04 | 0.03 |
| Gm6209        | predicted gene 6209                                                                                                                          | 5.36  | 2.4E-04 | 0.03 |
| Gm20735       | predicted gene, 20735                                                                                                                        | 4.71  | 2.5E-04 | 0.03 |
| Pygl          | liver glycogen phosphorylase                                                                                                                 | 2.24  | 2.6E-04 | 0.03 |
| Adrb1         | adrenergic receptor, beta 1                                                                                                                  | -6.00 | 2.7E-04 | 0.03 |
| Pla2g7        | phospholipase A2, group VII (platelet-activating factor acetylhydrolase, plasma)                                                             | 0.99  | 2.7E-04 | 0.03 |
| Hsf2bp        | heat shock transcription factor 2 binding protein                                                                                            | 6.22  | 2.8E-04 | 0.03 |
| Ctsl          | cathepsin L                                                                                                                                  | 1.55  | 2.8E-04 | 0.03 |
| Trpm1         | transient receptor potential cation channel, subfamily M, member 1                                                                           | -5.92 | 2.9E-04 | 0.03 |
| Ptchd1        | patched domain containing 1                                                                                                                  | -5.56 | 3.0E-04 | 0.03 |
| Ric3          | RIC3 acetylcholine receptor chaperone                                                                                                        | -5.28 | 3.0E-04 | 0.03 |
| Mast1         | microtubule associated serine/threonine kinase 1                                                                                             | -5.46 | 3.0E-04 | 0.03 |
| Gm38095       | NA                                                                                                                                           | -5.60 | 3.1E-04 | 0.03 |
| Gm10441       | predicted gene 10441                                                                                                                         | -5.62 | 3.1E-04 | 0.03 |
| Gm45752       | NA                                                                                                                                           | 5.41  | 3.1E-04 | 0.03 |
| Slamf1        | signaling lymphocytic activation molecule family member 1                                                                                    | -5.73 | 3.1E-04 | 0.03 |
| Etv3          | ets variant 3                                                                                                                                | -1.11 | 3.2E-04 | 0.03 |
| Mill2         | MHC I like leukocyte 2                                                                                                                       | -5.84 | 3.2E-04 | 0.03 |
| St3gal6       | ST3 beta-galactoside alpha-2,3-sialyltransferase 6                                                                                           | -2.77 | 3.2E-04 | 0.03 |
| Klf4          | Kruppel-like factor 4 (gut)                                                                                                                  | -1.46 | 3.3E-04 | 0.03 |
| Stard13       | StAR-related lipid transfer (START) domain containing 13                                                                                     | -5.80 | 3.3E-04 | 0.03 |
| Gm16062       | predicted gene 16062                                                                                                                         | -5.58 | 3.4E-04 | 0.03 |
| Olr1          | oxidized low density lipoprotein (lectin-like) receptor 1                                                                                    | 3.43  | 3.4E-04 | 0.03 |
| Gm42987       | NA                                                                                                                                           | 6.18  | 3.6E-04 | 0.04 |



|               |                                                                                                |       |         |      |
|---------------|------------------------------------------------------------------------------------------------|-------|---------|------|
| Hrh1          | histamine receptor H1                                                                          | -5.40 | 3.6E-04 | 0.04 |
| Rem1          | rad and gem related GTP binding protein 1                                                      | -5.76 | 3.6E-04 | 0.04 |
| D730045B01Rik | RIKEN cDNA D730045B01 gene                                                                     | -5.32 | 3.7E-04 | 0.04 |
| Txn1          | thioredoxin 1                                                                                  | 1.58  | 3.7E-04 | 0.04 |
| P4ha1         | procollagen-proline, 2-oxoglutarate 4-dioxygenase (proline 4-hydroxylase), alpha 1 polypeptide | 1.42  | 3.7E-04 | 0.04 |
| AB124611      | cDNA sequence AB124611                                                                         | 1.38  | 3.8E-04 | 0.04 |
| Cd96          | CD96 antigen                                                                                   | -4.63 | 3.8E-04 | 0.04 |
| Nynrin        | NYN domain and retroviral integrase containing                                                 | -4.54 | 3.8E-04 | 0.04 |
| Slamf7        | SLAM family member 7                                                                           | -1.69 | 3.9E-04 | 0.04 |
| Ccl12         | chemokine (C-C motif) ligand 12                                                                | -2.40 | 4.0E-04 | 0.04 |
| Cfh           | complement component factor h                                                                  | -1.88 | 4.1E-04 | 0.04 |
| Mtus1         | mitochondrial tumor suppressor 1                                                               | 1.20  | 4.1E-04 | 0.04 |
| Plekhg5       | pleckstrin homology domain containing, family G (with RhoGef domain) member 5                  | -6.85 | 4.1E-04 | 0.04 |
| Thsd4         | thrombospondin, type I, domain containing 4                                                    | -5.94 | 4.2E-04 | 0.04 |
| Creb3l4       | cAMP responsive element binding protein 3-like 4                                               | 5.28  | 4.3E-04 | 0.04 |
| Utp14b        | UTP14B small subunit processome component                                                      | -1.70 | 4.3E-04 | 0.04 |
| Tnfsf13b      | tumor necrosis factor (ligand) superfamily, member 13b                                         | -4.40 | 4.3E-04 | 0.04 |
| Helz2         | helicase with zinc finger 2, transcriptional coactivator                                       | 1.69  | 4.4E-04 | 0.04 |
| Ddit4         | DNA-damage-inducible transcript 4                                                              | 3.20  | 4.4E-04 | 0.04 |
| Pgd           | phosphogluconate dehydrogenase                                                                 | 1.21  | 4.5E-04 | 0.04 |
| Kcnt2         | potassium channel, subfamily T, member 2                                                       | -5.99 | 4.5E-04 | 0.04 |
| Uck2          | uridine-cytidine kinase 2                                                                      | 2.12  | 4.5E-04 | 0.04 |
| Gm45774       | NA                                                                                             | -5.09 | 4.6E-04 | 0.04 |
| 2510039O18Rik | RIKEN cDNA 2510039O18 gene                                                                     | 1.18  | 4.6E-04 | 0.04 |
| Gucy1a3       | guanylate cyclase 1, soluble, alpha 3                                                          | -5.59 | 4.7E-04 | 0.04 |
| Gm37354       | NA                                                                                             | -5.66 | 4.8E-04 | 0.04 |
| Crnde         | colorectal neoplasia differentially expressed (non-protein coding)                             | -5.43 | 4.8E-04 | 0.04 |
| Rfx2          | regulatory factor X, 2 (influences HLA class II expression)                                    | -3.19 | 4.8E-04 | 0.04 |
| Plxna4        | plexin A4                                                                                      | -2.43 | 4.9E-04 | 0.04 |
| Mamdc2        | MAM domain containing 2                                                                        | -5.54 | 4.9E-04 | 0.04 |
| Barx2         | BarH-like homeobox 2                                                                           | -5.07 | 5.0E-04 | 0.04 |
| Hk2           | hexokinase 2                                                                                   | 1.42  | 5.0E-04 | 0.04 |
| Soat1         | sterol O-acyltransferase 1                                                                     | 1.00  | 5.1E-04 | 0.04 |
| Osm           | oncostatin M                                                                                   | 1.99  | 5.1E-04 | 0.04 |
| Hspb1         | heat shock protein 1                                                                           | -4.10 | 5.1E-04 | 0.04 |
| Gm15326       | predicted gene 15326                                                                           | 5.08  | 5.2E-04 | 0.04 |
| Adam33        | a disintegrin and metallopeptidase domain 33                                                   | -4.82 | 5.2E-04 | 0.04 |
| Gclm          | glutamate-cysteine ligase, modifier subunit                                                    | 2.29  | 5.3E-04 | 0.04 |
| Tcaf1         | TRPM8 channel-associated factor 1                                                              | -5.97 | 5.4E-04 | 0.04 |
| E430014B02Rik | RIKEN cDNA E430014B02 gene                                                                     | -4.66 | 5.4E-04 | 0.04 |
| Fn1           | fibronectin 1                                                                                  | 1.85  | 5.4E-04 | 0.04 |
| N4bp1         | NEDD4 binding protein 1                                                                        | 1.13  | 5.4E-04 | 0.04 |
| Car11         | carbonic anhydrase 11                                                                          | -5.06 | 5.6E-04 | 0.05 |
| CT009713.10   | NA                                                                                             | 5.59  | 5.7E-04 | 0.05 |

|            |                                                                                                       |       |         |      |
|------------|-------------------------------------------------------------------------------------------------------|-------|---------|------|
| Gm37372    | NA                                                                                                    | 5.19  | 5.8E-04 | 0.05 |
| Retnla     | resistin like alpha                                                                                   | -6.32 | 5.8E-04 | 0.05 |
| Fgd2       | FYVE, RhoGEF and PH domain containing 2                                                               | -1.40 | 6.0E-04 | 0.05 |
| Cyp27a1    | cytochrome P450, family 27, subfamily a, polypeptide 1                                                | -1.49 | 6.3E-04 | 0.05 |
| Tpi1       | triosephosphate isomerase 1                                                                           | 1.71  | 6.3E-04 | 0.05 |
| Nostrin    | nitric oxide synthase trafficker                                                                      | -1.92 | 6.4E-04 | 0.05 |
| Cd74       | CD74 antigen (invariant polypeptide of major histocompatibility complex, class II antigen-associated) | -1.67 | 6.4E-04 | 0.05 |
| Gm15270    | predicted gene 15270                                                                                  | -4.73 | 6.4E-04 | 0.05 |
| Ighd       | immunoglobulin heavy constant delta                                                                   | -4.21 | 6.6E-04 | 0.05 |
| Pdk1       | pyruvate dehydrogenase kinase, isoenzyme 1                                                            | 2.46  | 6.6E-04 | 0.05 |
| Clec4d     | C-type lectin domain family 4, member d                                                               | 2.22  | 6.6E-04 | 0.05 |
| Msr1       | macrophage scavenger receptor 1                                                                       | 1.08  | 6.6E-04 | 0.05 |
| Cd226      | CD226 antigen                                                                                         | -5.36 | 6.6E-04 | 0.05 |
| Arid5b     | AT rich interactive domain 5B (MRF1-like)                                                             | 1.16  | 6.7E-04 | 0.05 |
| Slc11a1    | solute carrier family 11 (proton-coupled divalent metal ion transporters), member 1                   | 1.01  | 6.7E-04 | 0.05 |
| Adam10     | a disintegrin and metallopeptidase domain 10                                                          | 0.92  | 6.9E-04 | 0.05 |
| mt-Cytb    | NA                                                                                                    | -1.73 | 7.0E-04 | 0.05 |
| Ank1       | ankyrin 1, erythroid                                                                                  | -4.07 | 7.2E-04 | 0.05 |
| Gm43112    | NA                                                                                                    | -4.86 | 7.3E-04 | 0.05 |
| Hspa8      | heat shock protein 8                                                                                  | -0.81 | 7.3E-04 | 0.05 |
| Cadm1      | cell adhesion molecule 1                                                                              | -2.97 | 7.4E-04 | 0.05 |
| Gm18646    | adaptor protein complex AP-2, mu1 pseudogene                                                          | -4.72 | 7.4E-04 | 0.05 |
| Emilin2    | elastin microfibril interfacier 2                                                                     | 1.27  | 7.5E-04 | 0.05 |
| Egln1      | egl-9 family hypoxia-inducible factor 1                                                               | 1.21  | 7.6E-04 | 0.06 |
| Myliip     | myosin regulatory light chain interacting protein                                                     | -1.53 | 7.7E-04 | 0.06 |
| Pgk1       | phosphoglycerate kinase 1                                                                             | 2.57  | 7.7E-04 | 0.06 |
| Grap       | GRB2-related adaptor protein                                                                          | -3.28 | 7.8E-04 | 0.06 |
| Nav3       | neuron navigator 3                                                                                    | -5.29 | 8.0E-04 | 0.06 |
| AC152827.1 | NA                                                                                                    | -4.34 | 8.0E-04 | 0.06 |
| Fosb       | FBJ osteosarcoma oncogene B                                                                           | -1.22 | 8.2E-04 | 0.06 |
| Rag1       | recombination activating gene 1                                                                       | -5.94 | 8.2E-04 | 0.06 |
| Ptpn13     | protein tyrosine phosphatase, non-receptor type 13                                                    | -5.44 | 8.3E-04 | 0.06 |
| Cobll1     | Cobl-like 1                                                                                           | -4.76 | 8.4E-04 | 0.06 |
| H2-Eb1     | histocompatibility 2, class II antigen E beta                                                         | -1.56 | 8.4E-04 | 0.06 |
| Hlcs       | holocarboxylase synthetase (biotin- [propionyl-Coenzyme A-carboxylase (ATP-hydrolysing)] ligase)      | -1.76 | 8.5E-04 | 0.06 |
| Gm37215    | NA                                                                                                    | -4.58 | 8.5E-04 | 0.06 |
| Cmah       | cytidine monophospho-N-acetylneuraminic acid hydroxylase                                              | -3.38 | 8.6E-04 | 0.06 |
| Hepacam2   | HEPACAM family member 2                                                                               | -4.12 | 8.7E-04 | 0.06 |
| Elavl4     | ELAV (embryonic lethal, abnormal vision, Drosophila)-like 4 (Hu antigen D)                            | -4.71 | 8.8E-04 | 0.06 |
| Rab6b      | RAB6B, member RAS oncogene family                                                                     | -2.02 | 8.8E-04 | 0.06 |
| Oas2       | 2'-5' oligoadenylate synthetase 2                                                                     | -1.18 | 8.8E-04 | 0.06 |
| Spam1      | sperm adhesion molecule 1                                                                             | -4.30 | 9.1E-04 | 0.06 |
| Slco2b1    | solute carrier organic anion transporter family, member 2b1                                           | -2.49 | 9.2E-04 | 0.06 |

|               |                                                   |       |         |      |
|---------------|---------------------------------------------------|-------|---------|------|
| mt-Co1        | NA                                                | -1.57 | 9.2E-04 | 0.06 |
| 2610203C22Rik | RIKEN cDNA 2610203C22 gene                        | -3.79 | 9.5E-04 | 0.06 |
| Pgam1         | phosphoglycerate mutase 1                         | 3.63  | 9.5E-04 | 0.06 |
| lfi207        | interferon activated gene 207                     | -1.00 | 9.6E-04 | 0.06 |
| Marchf9       | membrane-associated ring finger (C3HC4) 9         | 4.90  | 9.6E-04 | 0.06 |
| Bank1         | B cell scaffold protein with ankyrin repeats 1    | -2.42 | 9.6E-04 | 0.06 |
| Adssl1        | adenylosuccinate synthetase like 1                | 2.05  | 9.6E-04 | 0.06 |
| Frk           | fyn-related kinase                                | -4.83 | 9.7E-04 | 0.06 |
| Fsd2          | fibronectin type III and SPRY domain containing 2 | -4.59 | 9.9E-04 | 0.06 |

**Table S8. Differentially Expressed Genes on the *Ager null* Recipient macrophages vs. *Ldlr<sup>-/-</sup>* not Transplanted macrophages. Comparison 2 (C2),  $p \leq 0.001$  and  $FDR \leq 0.2$ .**

| <u>SYMBOL</u> | <u>GENE NAME</u>                                                                                    | <u>log2FC</u> | <u>P.Value</u> | <u>fdr</u> |
|---------------|-----------------------------------------------------------------------------------------------------|---------------|----------------|------------|
| Cd209d        | CD209d antigen                                                                                      | -10.53        | 2.8E-09        | 4.9E-05    |
| Muc11         | mucin-like 1                                                                                        | -8.76         | 1.3E-08        | 8.1E-05    |
| C6            | complement component 6                                                                              | -10.38        | 1.4E-08        | 8.1E-05    |
| Hif1a         | hypoxia inducible factor 1, alpha subunit                                                           | 2.55          | 2.1E-08        | 9.1E-05    |
| Arg1          | arginase, liver                                                                                     | 8.82          | 2.9E-08        | 1.0E-04    |
| Ak4           | adenylate kinase 4                                                                                  | 8.27          | 4.0E-08        | 1.0E-04    |
| Cd209f        | CD209f antigen                                                                                      | -10.83        | 4.1E-08        | 1.0E-04    |
| Cd209b        | CD209b antigen                                                                                      | -9.57         | 5.0E-08        | 1.1E-04    |
| Fgf9          | fibroblast growth factor 9                                                                          | -7.20         | 5.8E-08        | 1.1E-04    |
| Pla2g7        | phospholipase A2, group VII (platelet-activating factor acetylhydrolase, plasma)                    | 1.67          | 7.1E-08        | 1.2E-04    |
| Tmem176a      | transmembrane protein 176A                                                                          | -2.39         | 8.3E-08        | 1.2E-04    |
| Chp2          | calcineurin-like EF hand protein 2                                                                  | -9.13         | 8.3E-08        | 1.2E-04    |
| Rtn4rl1       | reticulon 4 receptor-like 1                                                                         | -7.15         | 1.1E-07        | 1.4E-04    |
| Hpgd          | hydroxyprostaglandin dehydrogenase 15 (NAD)                                                         | -4.40         | 1.2E-07        | 1.4E-04    |
| F830016B08Rik | RIKEN cDNA F830016B08 gene<br>tetratricopeptide repeat, ankyrin repeat and coiled-coil containing 2 | -7.33         | 1.4E-07        | 1.6E-04    |
| Tanc2         |                                                                                                     | -2.95         | 2.0E-07        | 2.2E-04    |
| Naip1         | NLR family, apoptosis inhibitory protein 1                                                          | 8.01          | 2.6E-07        | 2.6E-04    |
| Gm20735       | predicted gene, 20735                                                                               | 6.79          | 3.0E-07        | 2.6E-04    |
| Thbs1         | thrombospondin 1                                                                                    | 3.73          | 3.0E-07        | 2.6E-04    |
| Vegfa         | vascular endothelial growth factor A                                                                | 3.76          | 3.0E-07        | 2.6E-04    |
| Enpep         | glutamyl aminopeptidase                                                                             | -8.22         | 3.7E-07        | 3.1E-04    |
| Tmod1         | tropomodulin 1                                                                                      | -8.46         | 4.6E-07        | 3.6E-04    |
| Aldoa         | aldolase A, fructose-bisphosphate                                                                   | 2.15          | 4.8E-07        | 3.6E-04    |
| B430306N03Rik | RIKEN cDNA B430306N03 gene                                                                          | 2.48          | 5.3E-07        | 3.9E-04    |
| Gm4524        | predicted gene 4524                                                                                 | -7.25         | 6.1E-07        | 4.3E-04    |
| Gm15487       | NA                                                                                                  | 5.12          | 7.3E-07        | 4.7E-04    |
| Hspa1a        | heat shock protein 1A                                                                               | -2.13         | 7.3E-07        | 4.7E-04    |
| Gm26686       | NA                                                                                                  | 7.18          | 8.0E-07        | 4.9E-04    |
| Cdr2          | cerebellar degeneration-related 2                                                                   | -6.13         | 8.4E-07        | 5.0E-04    |
| C4b           | complement component 4B (Chido blood group)                                                         | -3.69         | 8.7E-07        | 5.1E-04    |
| Lifr          | leukemia inhibitory factor receptor                                                                 | -2.53         | 9.4E-07        | 5.3E-04    |
| AC154742.1    | NA                                                                                                  | 7.87          | 1.0E-06        | 5.3E-04    |
| Pkm           | pyruvate kinase, muscle                                                                             | 1.97          | 1.0E-06        | 5.3E-04    |
| Eno1          | enolase 1, alpha non-neuron                                                                         | 2.05          | 1.1E-06        | 5.6E-04    |
| Klhl13        | kelch-like 13                                                                                       | -7.55         | 1.1E-06        | 5.7E-04    |
| Sulf2         | sulfatase 2                                                                                         | -1.73         | 1.2E-06        | 5.9E-04    |
| Saa3          | serum amyloid A 3                                                                                   | 7.24          | 1.3E-06        | 6.2E-04    |
| Tmem176b      | transmembrane protein 176B                                                                          | -1.89         | 1.4E-06        | 6.2E-04    |
| Hmga1-rs1     | high mobility group AT-hook I, related sequence 1                                                   | 5.68          | 1.7E-06        | 7.4E-04    |
| Dnajb1        | DnaJ heat shock protein family (Hsp40) member B1                                                    | -2.64         | 1.8E-06        | 7.9E-04    |

|            |                                                                                                                  |       |         |         |
|------------|------------------------------------------------------------------------------------------------------------------|-------|---------|---------|
| Thrb       | thyroid hormone receptor beta                                                                                    | -7.58 | 1.9E-06 | 7.9E-04 |
| AC159502.1 | NA                                                                                                               | 6.36  | 1.9E-06 | 8.0E-04 |
| Ifi207     | interferon activated gene 207                                                                                    | -1.67 | 2.0E-06 | 8.0E-04 |
| Gpr155     | G protein-coupled receptor 155                                                                                   | -3.54 | 2.4E-06 | 9.5E-04 |
| Jup        | junction plakoglobin                                                                                             | -2.41 | 2.5E-06 | 9.5E-04 |
| C2         | complement component 2 (within H-2S)                                                                             | -6.65 | 2.5E-06 | 9.5E-04 |
| Gm26714    | NA                                                                                                               | -5.99 | 2.6E-06 | 9.5E-04 |
| Spats2l    | spermatogenesis associated, serine-rich 2-like                                                                   | -6.90 | 2.6E-06 | 9.5E-04 |
| P3h2       | prolyl 3-hydroxylase 2                                                                                           | -8.14 | 2.7E-06 | 9.5E-04 |
| Ndst1      | N-deacetylase/N-sulfotransferase (heparan glucosaminyl) 1                                                        | 2.43  | 2.8E-06 | 9.8E-04 |
| Creb5      | cAMP responsive element binding protein 5                                                                        | -1.52 | 2.9E-06 | 1.0E-03 |
| Adam8      | a disintegrin and metallopeptidase domain 8                                                                      | 2.50  | 3.0E-06 | 1.0E-03 |
| Gpi1       | glucose phosphate isomerase 1                                                                                    | 1.70  | 3.1E-06 | 1.0E-03 |
| Rai14      | retinoic acid induced 14                                                                                         | 2.65  | 3.2E-06 | 1.0E-03 |
| Igf2r      | insulin-like growth factor 2 receptor                                                                            | 2.22  | 3.3E-06 | 1.0E-03 |
| Pmp22      | peripheral myelin protein 22                                                                                     | -3.67 | 3.4E-06 | 1.1E-03 |
| Negr1      | neuronal growth regulator 1                                                                                      | -6.62 | 3.4E-06 | 1.1E-03 |
| Slc2a1     | solute carrier family 2 (facilitated glucose transporter), member 1                                              | 3.23  | 4.0E-06 | 1.2E-03 |
| Itgam      | integrin alpha M                                                                                                 | 1.11  | 4.1E-06 | 1.2E-03 |
| Bst1       | bone marrow stromal cell antigen 1                                                                               | 1.91  | 4.2E-06 | 1.2E-03 |
| Gm45138    | NA                                                                                                               | -7.01 | 4.5E-06 | 1.3E-03 |
| Etv3       | ets variant 3                                                                                                    | -1.56 | 4.6E-06 | 1.3E-03 |
| Mgl2       | macrophage galactose N-acetyl-galactosamine specific lectin 2                                                    | -5.19 | 4.7E-06 | 1.3E-03 |
| Cd93       | CD93 antigen                                                                                                     | 1.87  | 5.0E-06 | 1.4E-03 |
| Tox        | thymocyte selection-associated high mobility group box leukocyte immunoglobulin-like receptor, subfamily A (with | -6.05 | 5.1E-06 | 1.4E-03 |
| Lilra5     | TM domain), member 5                                                                                             | -5.61 | 5.2E-06 | 1.4E-03 |
| Slamf9     | SLAM family member 9                                                                                             | -2.35 | 5.7E-06 | 1.5E-03 |
| Wnk2       | WNK lysine deficient protein kinase 2                                                                            | 6.42  | 5.8E-06 | 1.5E-03 |
| Oas2       | 2'-5' oligoadenylate synthetase 2                                                                                | -1.83 | 5.9E-06 | 1.5E-03 |
| Trbc2      | T cell receptor beta, constant 2                                                                                 | -7.64 | 6.2E-06 | 1.5E-03 |
| H2-Eb1     | histocompatibility 2, class II antigen E beta                                                                    | -2.41 | 6.2E-06 | 1.5E-03 |
| Gfra2      | glial cell line derived neurotrophic factor family receptor alpha 2                                              | -7.41 | 6.3E-06 | 1.5E-03 |
| Kcnn3      | potassium intermediate/small conductance calcium-activated channel, subfamily N, member 3                        | 7.45  | 6.3E-06 | 1.5E-03 |
| Rgs7bp     | regulator of G-protein signalling 7 binding protein                                                              | -7.31 | 6.4E-06 | 1.5E-03 |
| Cd74       | CD74 antigen (invariant polypeptide of major histocompatibility complex, class II antigen-associated)            | -2.51 | 6.6E-06 | 1.5E-03 |
| Ephx1      | epoxide hydrolase 1, microsomal                                                                                  | -4.77 | 6.6E-06 | 1.5E-03 |
| Pfkl       | phosphofructokinase, liver, B-type                                                                               | 2.59  | 7.1E-06 | 1.6E-03 |
| AC122426.1 | NA                                                                                                               | -6.45 | 7.1E-06 | 1.6E-03 |
| Themis     | thymocyte selection associated                                                                                   | -6.57 | 7.5E-06 | 1.6E-03 |
| Cd209g     | CD209g antigen                                                                                                   | -8.52 | 7.6E-06 | 1.6E-03 |
| Ighm       | immunoglobulin heavy constant mu                                                                                 | -2.25 | 8.1E-06 | 1.7E-03 |
| Fam20c     | family with sequence similarity 20, member C                                                                     | 3.16  | 8.1E-06 | 1.7E-03 |



|          |                                                                                     |       |         |         |
|----------|-------------------------------------------------------------------------------------|-------|---------|---------|
| Mical2   | MICAL-like 2                                                                        | 6.40  | 8.1E-06 | 1.7E-03 |
| Cd209e   | CD209e antigen                                                                      | -6.41 | 8.6E-06 | 1.8E-03 |
| Nwd1     | NACHT and WD repeat domain containing 1                                             | -7.00 | 8.9E-06 | 1.8E-03 |
| Lck      | lymphocyte protein tyrosine kinase                                                  | -6.47 | 9.0E-06 | 1.8E-03 |
| Rab6b    | RAB6B, member RAS oncogene family                                                   | -4.44 | 9.2E-06 | 1.8E-03 |
| Cd81     | CD81 antigen                                                                        | -2.27 | 9.2E-06 | 1.8E-03 |
| Cd209c   | CD209c antigen                                                                      | -6.31 | 9.3E-06 | 1.8E-03 |
| Ldha     | lactate dehydrogenase A                                                             | 1.81  | 9.7E-06 | 1.9E-03 |
| Zfhx3    | zinc finger homeobox 3                                                              | -1.32 | 9.9E-06 | 1.9E-03 |
| Sema6d   | sema domain, transmembrane domain (TM), and cytoplasmic domain, (semaphorin) 6D     | -4.20 | 1.1E-05 | 2.1E-03 |
| Epor     | erythropoietin receptor                                                             | -6.46 | 1.2E-05 | 2.2E-03 |
| Ctsl     | cathepsin L                                                                         | 1.93  | 1.2E-05 | 2.3E-03 |
| Sgpp1    | sphingosine-1-phosphate phosphatase 1                                               | -1.57 | 1.4E-05 | 2.5E-03 |
| Zbtb10   | zinc finger and BTB domain containing 10                                            | -2.73 | 1.4E-05 | 2.6E-03 |
| Reps2    | RALBP1 associated Eps domain containing protein 2                                   | -2.93 | 1.4E-05 | 2.6E-03 |
| Cd8a     | CD8 antigen, alpha chain                                                            | -6.01 | 1.5E-05 | 2.6E-03 |
| Anxa3    | annexin A3                                                                          | 1.73  | 1.5E-05 | 2.6E-03 |
| Dst      | dystonin                                                                            | -2.24 | 1.5E-05 | 2.7E-03 |
| Slamf7   | SLAM family member 7                                                                | -2.23 | 1.6E-05 | 2.7E-03 |
| Spp1     | secreted phosphoprotein 1                                                           | 3.33  | 1.6E-05 | 2.7E-03 |
| Tgm2     | transglutaminase 2, C polypeptide                                                   | 2.04  | 1.6E-05 | 2.7E-03 |
| Klf4     | Kruppel-like factor 4 (gut)                                                         | -1.86 | 1.7E-05 | 2.8E-03 |
| Fgd2     | FYVE, RhoGEF and PH domain containing 2                                             | -1.98 | 1.7E-05 | 2.8E-03 |
| Mb21d2   | Mab-21 domain containing 2                                                          | -6.05 | 1.8E-05 | 3.0E-03 |
| Galnt12  | UDP-N-acetyl-alpha-D-galactosamine:polypeptide N-acetylgalactosaminyltransferase 12 | -5.90 | 1.9E-05 | 3.1E-03 |
| Gm45752  | NA                                                                                  | 6.37  | 1.9E-05 | 3.1E-03 |
| Ifi2712a | interferon, alpha-inducible protein 27 like 2A                                      | -2.51 | 2.1E-05 | 3.3E-03 |
| Patj     | PATJ, crumbs cell polarity complex component                                        | -5.94 | 2.1E-05 | 3.3E-03 |
| Fn1      | fibronectin 1                                                                       | 2.34  | 2.1E-05 | 3.3E-03 |
| Cd6      | CD6 antigen                                                                         | -5.82 | 2.1E-05 | 3.3E-03 |
| Kbtbd11  | kelch repeat and BTB (POZ) domain containing 11                                     | -3.21 | 2.2E-05 | 3.4E-03 |
| Plin2    | perilipin 2                                                                         | 1.39  | 2.2E-05 | 3.4E-03 |
| Plin2    | perilipin 2                                                                         | 1.39  | 2.2E-05 | 3.4E-03 |
| Kcnt2    | potassium channel, subfamily T, member 2                                            | -7.31 | 2.2E-05 | 3.4E-03 |
| Ikbke    | inhibitor of kappaB kinase epsilon                                                  | 3.04  | 2.3E-05 | 3.4E-03 |
| Soat1    | sterol O-acyltransferase 1                                                          | 1.25  | 2.5E-05 | 3.7E-03 |
| Ctsd     | cathepsin D                                                                         | 1.81  | 2.6E-05 | 3.8E-03 |
| Gm38340  | NA                                                                                  | -6.26 | 2.7E-05 | 3.9E-03 |
| Egln3    | egl-9 family hypoxia-inducible factor 3                                             | 8.14  | 2.7E-05 | 3.9E-03 |
| Tns1     | tensin 1                                                                            | -2.60 | 2.7E-05 | 3.9E-03 |
| Abcc1    | ATP-binding cassette, sub-family C (CFTR/MRP), member 1                             | 1.18  | 2.8E-05 | 4.0E-03 |
| Hilpda   | hypoxia inducible lipid droplet associated                                          | 2.98  | 2.8E-05 | 4.0E-03 |
| Vsig4    | V-set and immunoglobulin domain containing 4                                        | -7.29 | 2.9E-05 | 4.1E-03 |
| Bcl11b   | B cell leukemia/lymphoma 11B                                                        | -6.73 | 3.0E-05 | 4.2E-03 |

|               |                                                                                                  |       |         |         |
|---------------|--------------------------------------------------------------------------------------------------|-------|---------|---------|
| H2-Ab1        | histocompatibility 2, class II antigen A, beta 1                                                 | -2.29 | 3.1E-05 | 4.3E-03 |
| Gm9825        | ribonucleic acid binding protein S1 pseudogene                                                   | 4.28  | 3.1E-05 | 4.3E-03 |
| Hspa1b        | heat shock protein 1B                                                                            | -2.49 | 3.2E-05 | 4.4E-03 |
| Gm37844       | NA                                                                                               | -6.18 | 3.2E-05 | 4.4E-03 |
| Kitl          | kit ligand                                                                                       | -5.38 | 3.3E-05 | 4.4E-03 |
| Rpl10a-ps2    | ribosomal protein L10A, pseudogene 2                                                             | 5.24  | 3.4E-05 | 4.5E-03 |
| Tppp          | tubulin polymerization promoting protein                                                         | -6.58 | 3.4E-05 | 4.5E-03 |
| Mtmr12        | myotubularin related protein 12                                                                  | -1.39 | 3.4E-05 | 4.5E-03 |
| Axl           | AXL receptor tyrosine kinase                                                                     | -1.51 | 3.5E-05 | 4.5E-03 |
| Gm37873       | NA                                                                                               | -5.46 | 3.7E-05 | 4.8E-03 |
| Pip4k2a       | phosphatidylinositol-5-phosphate 4-kinase, type II, alpha                                        | -1.07 | 3.9E-05 | 4.9E-03 |
| Zfp383        | zinc finger protein 383                                                                          | -5.20 | 3.9E-05 | 4.9E-03 |
| Aff3          | AF4/FMR2 family, member 3                                                                        | -6.14 | 3.9E-05 | 4.9E-03 |
| Ctse          | cathepsin E                                                                                      | 3.73  | 3.9E-05 | 4.9E-03 |
| Slc7a2        | solute carrier family 7 (cationic amino acid transporter, y+ system), member 2                   | 3.91  | 3.9E-05 | 4.9E-03 |
| Plxna4        | plexin A4                                                                                        | -3.77 | 4.0E-05 | 4.9E-03 |
| Ank2          | ankyrin 2, brain                                                                                 | -4.66 | 4.1E-05 | 5.0E-03 |
| Adssl1        | adenylosuccinate synthetase like 1                                                               | 2.65  | 4.2E-05 | 5.1E-03 |
| Stard8        | START domain containing 8                                                                        | -2.37 | 4.3E-05 | 5.1E-03 |
| Pygl          | liver glycogen phosphorylase                                                                     | 2.56  | 4.3E-05 | 5.1E-03 |
| Ldlr          | low density lipoprotein receptor                                                                 | 3.85  | 4.3E-05 | 5.1E-03 |
| Rtn1          | reticulum 1                                                                                      | -4.33 | 4.3E-05 | 5.1E-03 |
| Tnxb          | tenascin XB                                                                                      | -7.09 | 4.3E-05 | 5.1E-03 |
| Prdx5         | peroxiredoxin 5                                                                                  | 2.41  | 4.4E-05 | 5.1E-03 |
| Ust           | uronyl-2-sulfotransferase                                                                        | -2.87 | 4.4E-05 | 5.1E-03 |
| Cd163         | CD163 antigen                                                                                    | -3.64 | 4.5E-05 | 5.2E-03 |
| Msr1          | macrophage scavenger receptor 1                                                                  | 1.33  | 4.5E-05 | 5.2E-03 |
| Gm26584       | predicted gene, 26584                                                                            | 6.61  | 4.9E-05 | 5.5E-03 |
| Gpr34         | G protein-coupled receptor 34                                                                    | -3.27 | 4.9E-05 | 5.5E-03 |
| AF529169      | cDNA sequence AF529169                                                                           | -5.74 | 4.9E-05 | 5.5E-03 |
| Gm43751       | NA                                                                                               | -5.59 | 5.1E-05 | 5.6E-03 |
| Slc39a4       | solute carrier family 39 (zinc transporter), member 4                                            | 6.29  | 5.2E-05 | 5.7E-03 |
| Gm45540       | NA                                                                                               | -5.85 | 5.2E-05 | 5.8E-03 |
| Ptchd1        | patched domain containing 1                                                                      | -6.12 | 5.3E-05 | 5.8E-03 |
| Tpi1          | triosephosphate isomerase 1                                                                      | 2.07  | 5.4E-05 | 5.8E-03 |
| Hlcs          | holocarboxylase synthetase (biotin- [propionyl-Coenzyme A-carboxylase (ATP-hydrolysing)] ligase) | -2.46 | 5.5E-05 | 5.9E-03 |
| Gm28096       | NA                                                                                               | 5.30  | 5.5E-05 | 6.0E-03 |
| Fosb          | FBJ osteosarcoma oncogene B                                                                      | -1.53 | 5.7E-05 | 6.1E-03 |
| Hs3st3a1      | heparan sulfate (glucosamine) 3-O-sulfotransferase 3A1                                           | -5.31 | 5.8E-05 | 6.1E-03 |
| Ric3          | RIC3 acetylcholine receptor chaperone                                                            | -5.84 | 5.9E-05 | 6.2E-03 |
| Hsph1         | heat shock 105kDa/110kDa protein 1                                                               | -1.70 | 5.9E-05 | 6.2E-03 |
| Rag1          | recombination activating gene 1                                                                  | -7.11 | 6.1E-05 | 6.4E-03 |
| A430106G13Rik | RIKEN cDNA A430106G13 gene                                                                       | -5.50 | 6.2E-05 | 6.5E-03 |
| Cxxc5         | CXXC finger 5                                                                                    | -5.38 | 6.4E-05 | 6.6E-03 |

|               |                                                                                                                             |       |         |         |
|---------------|-----------------------------------------------------------------------------------------------------------------------------|-------|---------|---------|
| Serinc3       | serine incorporator 3                                                                                                       | -1.09 | 6.5E-05 | 6.6E-03 |
| Cadm1         | cell adhesion molecule 1                                                                                                    | -4.85 | 6.6E-05 | 6.8E-03 |
| Txn1          | thioredoxin 1                                                                                                               | 1.79  | 6.8E-05 | 6.8E-03 |
| Siglech       | sialic acid binding Ig-like lectin H                                                                                        | -6.28 | 6.8E-05 | 6.8E-03 |
| Faah          | fatty acid amide hydrolase                                                                                                  | -5.80 | 6.8E-05 | 6.8E-03 |
| Clec10a       | C-type lectin domain family 10, member A                                                                                    | -3.06 | 7.0E-05 | 6.9E-03 |
| 2610203C22Rik | RIKEN cDNA 2610203C22 gene<br>nuclear factor of activated T cells, cytoplasmic, calcineurin<br>dependent 2                  | -4.75 | 7.1E-05 | 7.0E-03 |
| Nfatc2        | proteinase 3                                                                                                                | -1.70 | 7.2E-05 | 7.0E-03 |
| Prtn3         | regulatory factor X, 2 (influences HLA class II expression)                                                                 | 5.47  | 7.3E-05 | 7.2E-03 |
| Rfx2          | NA                                                                                                                          | -4.57 | 7.4E-05 | 7.2E-03 |
| Gm42994       | CD83 antigen                                                                                                                | -5.26 | 7.5E-05 | 7.2E-03 |
| Cd83          | pleckstrin and Sec7 domain containing 3                                                                                     | -1.93 | 7.5E-05 | 7.2E-03 |
| Psd3          | mitochondria localized glutamic acid rich protein                                                                           | -2.29 | 7.7E-05 | 7.3E-03 |
| Mgarp         | peroxiredoxin 6                                                                                                             | 6.14  | 7.7E-05 | 7.3E-03 |
| Prdx6         | activating transcription factor 3                                                                                           | 1.82  | 7.7E-05 | 7.3E-03 |
| Atf3          | C-type lectin domain family 4, member d                                                                                     | -1.18 | 7.8E-05 | 7.3E-03 |
| Clec4d        | phosphogluconate dehydrogenase                                                                                              | 2.62  | 7.9E-05 | 7.4E-03 |
| Pgd           | predicted gene 6209                                                                                                         | 1.37  | 7.9E-05 | 7.4E-03 |
| Gm6209        | NYN domain and retroviral integrase containing<br>solute carrier family 16 (monocarboxylic acid transporters),<br>member 10 | 5.71  | 8.1E-05 | 7.5E-03 |
| Nynrin        | src family associated phosphoprotein 1                                                                                      | -4.97 | 8.1E-05 | 7.5E-03 |
| Slc16a10      | NA                                                                                                                          | 1.11  | 8.4E-05 | 7.7E-03 |
| Skap1         | dihydropyrimidine dehydrogenase                                                                                             | -5.73 | 8.5E-05 | 7.7E-03 |
| Gm37354       | carbonic anhydrase 4                                                                                                        | -6.29 | 8.5E-05 | 7.7E-03 |
| Dpyd          | lymphatic vessel endothelial hyaluronan receptor 1                                                                          | -4.70 | 8.8E-05 | 8.0E-03 |
| Car4          | solute carrier family 5 (inositol transporters), member 3                                                                   | 5.51  | 9.0E-05 | 8.0E-03 |
| Lyve1         | phospholipase A2, group IID                                                                                                 | -5.79 | 9.3E-05 | 8.3E-03 |
| Slc5a3        | chemokine (C-C motif) ligand 12                                                                                             | -2.63 | 9.6E-05 | 8.6E-03 |
| Pla2g2d       | N-acylethanolamine acid amidase                                                                                             | -7.77 | 9.8E-05 | 8.6E-03 |
| Ccl12         | solute carrier organic anion transporter family, member 2b1                                                                 | -2.73 | 9.8E-05 | 8.6E-03 |
| Ccl12         | phosphoglycerate kinase 1                                                                                                   | -1.48 | 9.9E-05 | 8.7E-03 |
| Naaa          | RIKEN cDNA C230031I18 gene<br>solute carrier family 11 (proton-coupled divalent metal ion<br>transporters), member 2        | -3.24 | 9.9E-05 | 8.7E-03 |
| Slco2b1       | coronin 6                                                                                                                   | 3.04  | 1.0E-04 | 8.7E-03 |
| Pgk1          | heat shock protein 1 (chaperonin) pseudogene 5                                                                              | -5.61 | 1.0E-04 | 8.7E-03 |
| C230031I18Rik | UTP14B small subunit processome component<br>solute carrier family 16 (monocarboxylic acid transporters),<br>member 14      | -1.81 | 1.0E-04 | 8.7E-03 |
| Slc11a2       | heat shock transcription factor 3                                                                                           | -1.81 | 1.0E-04 | 8.7E-03 |
| Coro6         | NA                                                                                                                          | -5.93 | 1.0E-04 | 8.8E-03 |
| Coro6         | heat shock protein 1 (chaperonin) pseudogene 5                                                                              | -5.38 | 1.0E-04 | 8.8E-03 |
| Gm9655        | UTP14B small subunit processome component<br>solute carrier family 16 (monocarboxylic acid transporters),<br>member 14      | -1.94 | 1.1E-04 | 9.4E-03 |
| Utp14b        | heat shock protein 1                                                                                                        | -5.41 | 1.1E-04 | 9.4E-03 |
| Slc16a14      | heat shock transcription factor 3                                                                                           | -5.14 | 1.1E-04 | 9.4E-03 |
| Hsf3          | NA                                                                                                                          | -5.14 | 1.1E-04 | 9.4E-03 |
| Gm42972       | heat shock protein 1                                                                                                        | -5.60 | 1.1E-04 | 9.5E-03 |
| Hspb1         | ninein-like                                                                                                                 | -4.52 | 1.1E-04 | 9.5E-03 |
| Hspb1         | X-linked lymphocyte-regulated                                                                                               | -4.52 | 1.1E-04 | 9.5E-03 |
| Ninl          |                                                                                                                             | -5.37 | 1.2E-04 | 9.6E-03 |
| Xlr           |                                                                                                                             | -4.57 | 1.2E-04 | 9.6E-03 |

|               |                                                                                                                                               |       |         |         |
|---------------|-----------------------------------------------------------------------------------------------------------------------------------------------|-------|---------|---------|
| Gm4951        | predicted gene 4951                                                                                                                           | -4.86 | 1.2E-04 | 9.8E-03 |
| Il1rl1        | interleukin 1 receptor-like 1                                                                                                                 | -4.07 | 1.2E-04 | 9.9E-03 |
| Pea15a        | phosphoprotein enriched in astrocytes 15A                                                                                                     | -1.75 | 1.2E-04 | 0.01    |
| Epcam         | epithelial cell adhesion molecule                                                                                                             | -5.37 | 1.2E-04 | 0.01    |
| Hepacam2      | HEPACAM family member 2                                                                                                                       | -4.81 | 1.3E-04 | 0.01    |
| Blnk          | B cell linker                                                                                                                                 | -2.07 | 1.3E-04 | 0.01    |
| Mef2c         | myocyte enhancer factor 2C                                                                                                                    | -1.54 | 1.3E-04 | 0.01    |
| Hrh1          | histamine receptor H1                                                                                                                         | -5.65 | 1.3E-04 | 0.01    |
| Fabp7         | fatty acid binding protein 7, brain                                                                                                           | 5.67  | 1.3E-04 | 0.01    |
| Pgam1         | phosphoglycerate mutase 1                                                                                                                     | 4.20  | 1.3E-04 | 0.01    |
| Thsd4         | thrombospondin, type I, domain containing 4                                                                                                   | -6.26 | 1.3E-04 | 0.01    |
| Emilin2       | elastin microfibril interfacier 2                                                                                                             | 1.46  | 1.3E-04 | 0.01    |
| Gm15270       | predicted gene 15270                                                                                                                          | -5.28 | 1.4E-04 | 0.01    |
| Trbc1         | T cell receptor beta, constant region 1                                                                                                       | -6.20 | 1.5E-04 | 0.01    |
| Itk           | IL2 inducible T cell kinase                                                                                                                   | -6.92 | 1.5E-04 | 0.01    |
| Raet1e        | retinoic acid early transcript 1E                                                                                                             | 4.77  | 1.5E-04 | 0.01    |
| Grap          | GRB2-related adaptor protein                                                                                                                  | -3.94 | 1.5E-04 | 0.01    |
| Clec4n        | C-type lectin domain family 4, member n<br>homocysteine-inducible, endoplasmic reticulum stress-<br>inducible, ubiquitin-like domain member 1 | 2.18  | 1.6E-04 | 0.01    |
| Herpud1       |                                                                                                                                               | -1.87 | 1.6E-04 | 0.01    |
| Zfp248        | zinc finger protein 248                                                                                                                       | -5.15 | 1.6E-04 | 0.01    |
| Snx18         | sorting nexin 18                                                                                                                              | 1.06  | 1.6E-04 | 0.01    |
| Adam33        | a disintegrin and metallopeptidase domain 33                                                                                                  | -5.52 | 1.6E-04 | 0.01    |
| Mlph          | melanophilin                                                                                                                                  | -5.26 | 1.6E-04 | 0.01    |
| Arhgef6       | Rac/Cdc42 guanine nucleotide exchange factor (GEF) 6                                                                                          | -0.99 | 1.7E-04 | 0.01    |
| Pld4          | phospholipase D family, member 4                                                                                                              | -1.02 | 1.8E-04 | 0.01    |
| Capg          | capping protein (actin filament), gelsolin-like                                                                                               | 1.20  | 1.8E-04 | 0.01    |
| F7            | coagulation factor VII                                                                                                                        | 4.68  | 1.8E-04 | 0.01    |
| H2-M3         | histocompatibility 2, M region locus 3                                                                                                        | -2.17 | 1.8E-04 | 0.01    |
| Lix1          | limb and CNS expressed 1                                                                                                                      | -4.72 | 1.8E-04 | 0.01    |
| Fat3          | FAT atypical cadherin 3                                                                                                                       | -7.16 | 1.9E-04 | 0.01    |
| Ajuba         | ajuba LIM protein                                                                                                                             | -5.30 | 1.9E-04 | 0.01    |
| Cbr2          | carbonyl reductase 2                                                                                                                          | -3.30 | 1.9E-04 | 0.01    |
| Dnaj1         | DnaJ heat shock protein family (Hsp40) member A1                                                                                              | -1.19 | 1.9E-04 | 0.01    |
| F10           | coagulation factor X                                                                                                                          | 2.83  | 2.0E-04 | 0.01    |
| Retnla        | resistin like alpha                                                                                                                           | -4.97 | 2.0E-04 | 0.01    |
| Kmo           | kynurenine 3-monooxygenase (kynurenine 3-hydroxylase)                                                                                         | -3.40 | 2.0E-04 | 0.01    |
| 1700025G04Rik | RIKEN cDNA 1700025G04 gene                                                                                                                    | -1.79 | 2.0E-04 | 0.01    |
| Frrs1         | ferric-chelate reductase 1                                                                                                                    | 1.16  | 2.1E-04 | 0.01    |
| Gas6          | growth arrest specific 6                                                                                                                      | -3.19 | 2.1E-04 | 0.01    |
| Fxyd2         | FXDY domain-containing ion transport regulator 2                                                                                              | -4.08 | 2.1E-04 | 0.01    |
| A4galt        | alpha 1,4-galactosyltransferase                                                                                                               | -5.75 | 2.2E-04 | 0.01    |
| Tslp          | thymic stromal lymphopoietin                                                                                                                  | -5.03 | 2.2E-04 | 0.02    |
| Dnm1          | dynamain 1                                                                                                                                    | -3.41 | 2.3E-04 | 0.02    |
| Ppfia4        | protein tyrosine phosphatase, receptor type, f polypeptide<br>(PTPRF), interacting protein (liprin), alpha 4                                  | -5.92 | 2.3E-04 | 0.02    |

|               |                                                                                 |       |         |      |
|---------------|---------------------------------------------------------------------------------|-------|---------|------|
| Olr1          | oxidized low density lipoprotein (lectin-like) receptor 1                       | 3.51  | 2.3E-04 | 0.02 |
| Rem1          | rad and gem related GTP binding protein 1                                       | -5.76 | 2.3E-04 | 0.02 |
| Pxdc1         | PX domain containing 1                                                          | -4.17 | 2.4E-04 | 0.02 |
| Kcnj10        | potassium inwardly-rectifying channel, subfamily J, member 10                   | -4.78 | 2.4E-04 | 0.02 |
| Notch4        | notch 4                                                                         | 5.64  | 2.4E-04 | 0.02 |
| Cfh           | complement component factor h                                                   | -1.91 | 2.5E-04 | 0.02 |
| Mbnl1         | muscleblind-like 1 (Drosophila)                                                 | -0.77 | 2.5E-04 | 0.02 |
| Gm38228       | NA                                                                              | 4.83  | 2.5E-04 | 0.02 |
| Slc6a12       | solute carrier family 6 (neurotransmitter transporter, betaine/GABA), member 12 | 6.09  | 2.5E-04 | 0.02 |
| Gm38095       | NA                                                                              | -5.50 | 2.6E-04 | 0.02 |
| 4930556M19Rik | RIKEN cDNA 4930556M19 gene                                                      | 5.29  | 2.6E-04 | 0.02 |
| Jag1          | jagged 1                                                                        | 2.01  | 2.6E-04 | 0.02 |
| Plcb1         | phospholipase C, beta 1                                                         | 3.54  | 2.7E-04 | 0.02 |
| D730045B01Rik | RIKEN cDNA D730045B01 gene                                                      | -5.29 | 2.7E-04 | 0.02 |
| Nr1d1         | nuclear receptor subfamily 1, group D, member 1                                 | -2.64 | 2.7E-04 | 0.02 |
| Hsp90aa1      | heat shock protein 90, alpha (cytosolic), class A member 1                      | -1.20 | 2.9E-04 | 0.02 |
| Adrb1         | adrenergic receptor, beta 1                                                     | -5.71 | 2.9E-04 | 0.02 |
| Igsf9         | immunoglobulin superfamily, member 9                                            | -3.26 | 3.0E-04 | 0.02 |
| Bank1         | B cell scaffold protein with ankyrin repeats 1                                  | -2.67 | 3.0E-04 | 0.02 |
| Gm10441       | predicted gene 10441                                                            | -5.26 | 3.0E-04 | 0.02 |
| Ifi203        | interferon activated gene 203                                                   | -1.29 | 3.1E-04 | 0.02 |
| AC124346.3    | NA                                                                              | -4.72 | 3.1E-04 | 0.02 |
| Fam129a       | family with sequence similarity 129, member A                                   | -1.13 | 3.2E-04 | 0.02 |
| Mtus1         | mitochondrial tumor suppressor 1                                                | 1.20  | 3.2E-04 | 0.02 |
| Mat2a         | methionine adenosyltransferase II, alpha                                        | -1.08 | 3.2E-04 | 0.02 |
| Spry1         | sprouty homolog 1 (Drosophila)                                                  | -4.81 | 3.3E-04 | 0.02 |
| Ttc28         | tetratricopeptide repeat domain 28                                              | -3.31 | 3.3E-04 | 0.02 |
| Gm24727       | NA                                                                              | 4.53  | 3.4E-04 | 0.02 |
| Atp1b1        | ATPase, Na <sup>+</sup> /K <sup>+</sup> transporting, beta 1 polypeptide        | -5.59 | 3.4E-04 | 0.02 |
| Trac          | T cell receptor alpha constant                                                  | -5.96 | 3.4E-04 | 0.02 |
| Mill2         | MHC I like leukocyte 2                                                          | -5.52 | 3.4E-04 | 0.02 |
| Abca9         | ATP-binding cassette, sub-family A (ABC1), member 9                             | -1.64 | 3.4E-04 | 0.02 |
| Cd96          | CD96 antigen                                                                    | -4.52 | 3.4E-04 | 0.02 |
| AC159283.2    | NA                                                                              | -4.79 | 3.5E-04 | 0.02 |
| Slc16a3       | solute carrier family 16 (monocarboxylic acid transporters), member 3           | 2.47  | 3.5E-04 | 0.02 |
| Nav3          | neuron navigator 3                                                              | -5.49 | 3.5E-04 | 0.02 |
| Camk4         | calcium/calmodulin-dependent protein kinase IV                                  | -4.94 | 3.5E-04 | 0.02 |
| Gm8995        | predicted gene 8995                                                             | -0.96 | 3.6E-04 | 0.02 |
| Trpm1         | transient receptor potential cation channel, subfamily M, member 1              | -5.60 | 3.6E-04 | 0.02 |
| Mamdc2        | MAM domain containing 2                                                         | -5.40 | 3.6E-04 | 0.02 |
| Plxna4os2     | plexin A4, opposite strand 2                                                    | -4.97 | 3.6E-04 | 0.02 |
| Spam1         | sperm adhesion molecule 1                                                       | -4.56 | 3.6E-04 | 0.02 |
| Stard13       | StAR-related lipid transfer (START) domain containing 13                        | -5.31 | 3.7E-04 | 0.02 |

|                |                                                                                                                                                             |       |         |      |
|----------------|-------------------------------------------------------------------------------------------------------------------------------------------------------------|-------|---------|------|
| Irf4           | interferon regulatory factor 4                                                                                                                              | -2.95 | 3.7E-04 | 0.02 |
| Pdk1           | pyruvate dehydrogenase kinase, isoenzyme 1                                                                                                                  | 2.56  | 3.7E-04 | 0.02 |
| Hspa8          | heat shock protein 8                                                                                                                                        | -0.84 | 3.7E-04 | 0.02 |
| Lif            | leukemia inhibitory factor                                                                                                                                  | 4.80  | 3.7E-04 | 0.02 |
| Colgalt2       | collagen beta(1-O)galactosyltransferase 2                                                                                                                   | -5.55 | 3.7E-04 | 0.02 |
| E430014B02Rik  | RIKEN cDNA E430014B02 gene                                                                                                                                  | -4.63 | 3.8E-04 | 0.02 |
| Wbp11          | WW domain binding protein 1 like                                                                                                                            | 1.01  | 3.8E-04 | 0.02 |
| Hectd2         | HECT domain containing 2                                                                                                                                    | -3.79 | 3.8E-04 | 0.02 |
| Espn           | espin                                                                                                                                                       | -5.64 | 3.8E-04 | 0.02 |
| Gm36963        | NA                                                                                                                                                          | -4.24 | 3.9E-04 | 0.02 |
| Nsg2           | neuron specific gene family member 2                                                                                                                        | -5.11 | 3.9E-04 | 0.02 |
| Dmxl2          | Dmx-like 2                                                                                                                                                  | 2.18  | 3.9E-04 | 0.02 |
| Neurl1a        | neuralized E3 ubiquitin protein ligase 1A                                                                                                                   | -4.44 | 4.0E-04 | 0.02 |
| Trerf1         | transcriptional regulating factor 1                                                                                                                         | -1.75 | 4.0E-04 | 0.02 |
| 9930111J21Rik2 | RIKEN cDNA 9930111J21 gene 2                                                                                                                                | -1.78 | 4.0E-04 | 0.02 |
| Cd209a         | CD209a antigen                                                                                                                                              | -6.35 | 4.0E-04 | 0.02 |
| Ptger4         | prostaglandin E receptor 4 (subtype EP4)                                                                                                                    | -1.26 | 4.1E-04 | 0.02 |
| Gys1           | glycogen synthase 1, muscle                                                                                                                                 | 2.22  | 4.1E-04 | 0.02 |
| Agmo           | alkylglycerol monooxygenase                                                                                                                                 | -3.76 | 4.2E-04 | 0.02 |
| Cd3g           | CD3 antigen, gamma polypeptide                                                                                                                              | -5.64 | 4.2E-04 | 0.02 |
| Jun            | jun proto-oncogene                                                                                                                                          | -1.06 | 4.3E-04 | 0.02 |
| Slc14a1        | solute carrier family 14 (urea transporter), member 1<br>procollagen-proline, 2-oxoglutarate 4-dioxygenase (proline 4-<br>hydroxylase), alpha 1 polypeptide | -4.97 | 4.3E-04 | 0.02 |
| P4ha1          |                                                                                                                                                             | 1.38  | 4.4E-04 | 0.02 |
| Fgl2           | fibrinogen-like protein 2                                                                                                                                   | -1.63 | 4.4E-04 | 0.02 |
| Barx2          | BarH-like homeobox 2                                                                                                                                        | -4.96 | 4.4E-04 | 0.02 |
| Lag3           | lymphocyte-activation gene 3                                                                                                                                | -4.52 | 4.4E-04 | 0.02 |
| Chil1          | chitinase-like 1                                                                                                                                            | 6.60  | 4.5E-04 | 0.02 |
| Cmah           | cytidine monophospho-N-acetylneuraminic acid hydroxylase                                                                                                    | -4.56 | 4.6E-04 | 0.02 |
| Gm6377         | predicted gene 6377                                                                                                                                         | -1.48 | 4.6E-04 | 0.02 |
| Dcaf12         | DDB1 and CUL4 associated factor 12                                                                                                                          | 1.28  | 4.6E-04 | 0.02 |
| Sytl2          | synaptotagmin-like 2                                                                                                                                        | -4.92 | 4.7E-04 | 0.02 |
| 2010005H15Rik  | RIKEN cDNA 2010005H15 gene                                                                                                                                  | 6.86  | 4.7E-04 | 0.02 |
| Ccl8           | chemokine (C-C motif) ligand 8                                                                                                                              | -5.04 | 4.7E-04 | 0.02 |
| Gm42793        | NA                                                                                                                                                          | 3.68  | 4.8E-04 | 0.02 |
| Cacna1a        | calcium channel, voltage-dependent, P/Q type, alpha 1A<br>subunit                                                                                           | -5.70 | 4.8E-04 | 0.03 |
| Nt5e           | 5' nucleotidase, ecto                                                                                                                                       | 3.98  | 4.9E-04 | 0.03 |
| Dntt           | deoxynucleotidyltransferase, terminal                                                                                                                       | -5.30 | 4.9E-04 | 0.03 |
| Frmd4b         | FERM domain containing 4B                                                                                                                                   | -1.63 | 4.9E-04 | 0.03 |
| Pltp           | phospholipid transfer protein                                                                                                                               | -1.60 | 5.0E-04 | 0.03 |
| Slc45a1        | solute carrier family 45, member 1                                                                                                                          | -4.91 | 5.0E-04 | 0.03 |
| Ric1           | RAB6A GEF complex partner 1                                                                                                                                 | 1.27  | 5.1E-04 | 0.03 |
| Gkap1          | G kinase anchoring protein 1                                                                                                                                | -2.73 | 5.2E-04 | 0.03 |
| Arid5a         | AT rich interactive domain 5A (MRF1-like)                                                                                                                   | -1.26 | 5.2E-04 | 0.03 |
| Timd4          | T cell immunoglobulin and mucin domain containing 4                                                                                                         | -6.10 | 5.2E-04 | 0.03 |

|                |                                                                                     |       |         |      |
|----------------|-------------------------------------------------------------------------------------|-------|---------|------|
| Fmnl2          | formin-like 2                                                                       | 1.30  | 5.2E-04 | 0.03 |
| Usp24          | ubiquitin specific peptidase 24                                                     | -0.90 | 5.2E-04 | 0.03 |
| Ighd           | immunoglobulin heavy constant delta                                                 | -4.10 | 5.2E-04 | 0.03 |
| Gm15713        | predicted gene 15713                                                                | -4.92 | 5.2E-04 | 0.03 |
| Gspt2          | G1 to S phase transition 2                                                          | 5.39  | 5.3E-04 | 0.03 |
| Xcl1           | chemokine (C motif) ligand 1                                                        | -5.16 | 5.3E-04 | 0.03 |
| Nostrin        | nitric oxide synthase trafficker                                                    | -1.99 | 5.4E-04 | 0.03 |
| Arhgef10       | Rho guanine nucleotide exchange factor (GEF) 10                                     | -4.37 | 5.4E-04 | 0.03 |
| Mif            | macrophage migration inhibitory factor                                              | 2.95  | 5.4E-04 | 0.03 |
| 9930111J21Rik1 | RIKEN cDNA 9930111J21 gene 1                                                        | -2.06 | 5.5E-04 | 0.03 |
| Stxbp6         | syntaxin binding protein 6 (amisyn)                                                 | -2.36 | 5.6E-04 | 0.03 |
| Ada            | adenosine deaminase                                                                 | -2.55 | 5.6E-04 | 0.03 |
| AC160637.1     | NA                                                                                  | 2.63  | 5.6E-04 | 0.03 |
| Slc27a3        | solute carrier family 27 (fatty acid transporter), member 3                         | -5.60 | 5.7E-04 | 0.03 |
| Etv1           | ets variant 1                                                                       | -2.80 | 5.7E-04 | 0.03 |
| Gm12117        | glyceraldehyde-3-phosphate dehydrogenase pseudogene                                 | 3.95  | 5.8E-04 | 0.03 |
| Ildr2          | immunoglobulin-like domain containing receptor 2                                    | -6.71 | 5.9E-04 | 0.03 |
| Dzip1          | DAZ interacting protein 1                                                           | -4.92 | 5.9E-04 | 0.03 |
| Npepps         | aminopeptidase puromycin sensitive                                                  | 1.35  | 5.9E-04 | 0.03 |
| Gm28913        | NA                                                                                  | 4.51  | 6.0E-04 | 0.03 |
| Myh6           | myosin, heavy polypeptide 6, cardiac muscle, alpha                                  | -5.63 | 6.0E-04 | 0.03 |
| Rhbdf1         | rhomoid 5 homolog 1                                                                 | -4.77 | 6.0E-04 | 0.03 |
| Ly6e           | lymphocyte antigen 6 complex, locus E                                               | -1.21 | 6.2E-04 | 0.03 |
| Vash1          | vasohibin 1                                                                         | -4.93 | 6.3E-04 | 0.03 |
| Anks1b         | ankyrin repeat and sterile alpha motif domain containing 1B                         | -4.42 | 6.3E-04 | 0.03 |
| Sort1          | sortilin 1                                                                          | 1.52  | 6.3E-04 | 0.03 |
| Gclm           | glutamate-cysteine ligase, modifier subunit                                         | 2.23  | 6.4E-04 | 0.03 |
| Gm29480        | predicted gene 29480                                                                | 5.30  | 6.4E-04 | 0.03 |
| Pepd           | peptidase D                                                                         | -1.49 | 6.7E-04 | 0.03 |
| Sox7           | SRY (sex determining region Y)-box 7                                                | -5.27 | 6.8E-04 | 0.03 |
| 1700047M11Rik  | RIKEN cDNA 1700047M11 gene                                                          | 5.47  | 6.8E-04 | 0.03 |
| Vcan           | versican                                                                            | 2.74  | 6.9E-04 | 0.03 |
| Mylip          | myosin regulatory light chain interacting protein                                   | -1.51 | 6.9E-04 | 0.03 |
| Gpr160         | G protein-coupled receptor 160                                                      | -1.41 | 7.0E-04 | 0.03 |
| Magi1          | membrane associated guanylate kinase, WW and PDZ domain containing 1                | -5.64 | 7.1E-04 | 0.03 |
| Chn2           | chimerin 2                                                                          | -3.21 | 7.2E-04 | 0.03 |
| Ankrd37        | ankyrin repeat domain 37                                                            | 5.06  | 7.2E-04 | 0.03 |
| Slc11a1        | solute carrier family 11 (proton-coupled divalent metal ion transporters), member 1 | 0.99  | 7.3E-04 | 0.03 |
| Tgfb2          | transforming growth factor, beta receptor II                                        | -1.06 | 7.3E-04 | 0.03 |
| Plekhg5        | pleckstrin homology domain containing, family G (with RhoGef domain) member 5       | -5.29 | 7.4E-04 | 0.03 |
| Cfap157        | cilia and flagella associated protein 157                                           | 4.98  | 7.6E-04 | 0.03 |
| Fbx15          | F-box and leucine-rich repeat protein 5                                             | 2.13  | 7.7E-04 | 0.03 |
| Syt3           | synaptotagmin III                                                                   | -5.57 | 7.8E-04 | 0.04 |

|               |                                                                            |       |         |      |
|---------------|----------------------------------------------------------------------------|-------|---------|------|
| Hpgds         | hematopoietic prostaglandin D synthase                                     | -1.98 | 7.8E-04 | 0.04 |
| Sgk1          | serum/glucocorticoid regulated kinase 1                                    | 1.41  | 7.8E-04 | 0.04 |
| Tnfrsf9       | tumor necrosis factor receptor superfamily, member 9                       | 4.32  | 7.8E-04 | 0.04 |
| Homer2        | homer scaffolding protein 2                                                | -5.11 | 7.9E-04 | 0.04 |
| Elavl4        | ELAV (embryonic lethal, abnormal vision, Drosophila)-like 4 (Hu antigen D) | -4.60 | 8.1E-04 | 0.04 |
| Gm20658       | predicted gene 20658                                                       | 5.46  | 8.1E-04 | 0.04 |
| Tarm1         | T cell-interacting, activating receptor on myeloid cells 1                 | 5.62  | 8.1E-04 | 0.04 |
| Vill          | villin-like                                                                | 3.95  | 8.1E-04 | 0.04 |
| Glrx          | glutaredoxin                                                               | 1.70  | 8.1E-04 | 0.04 |
| Gm17228       | actin, gamma, cytoplasmic 1 pseudogene                                     | -3.19 | 8.2E-04 | 0.04 |
| 2610306O10Rik | RIKEN cDNA 2610306O10 gene                                                 | -4.39 | 8.3E-04 | 0.04 |
| Ogn           | osteoglycin                                                                | -5.37 | 8.4E-04 | 0.04 |
| Ablim3        | actin binding LIM protein family, member 3                                 | -4.83 | 8.4E-04 | 0.04 |
| Fsd2          | fibronectin type III and SPRY domain containing 2                          | -4.52 | 8.4E-04 | 0.04 |
| Cyp27a1       | cytochrome P450, family 27, subfamily a, polypeptide 1                     | -1.39 | 8.4E-04 | 0.04 |
| Scara5        | scavenger receptor class A, member 5                                       | -5.94 | 8.5E-04 | 0.04 |
| Pros1         | protein S (alpha)                                                          | -1.85 | 8.8E-04 | 0.04 |
| Ero1l         | ERO1-like ( <i>S. cerevisiae</i> )                                         | 2.86  | 8.8E-04 | 0.04 |
| Adam10        | a disintegrin and metallopeptidase domain 10                               | 0.88  | 8.9E-04 | 0.04 |
| Clec4b1       | C-type lectin domain family 4, member b1                                   | -4.54 | 8.9E-04 | 0.04 |
| H2-Aa         | histocompatibility 2, class II antigen A, alpha                            | -2.05 | 8.9E-04 | 0.04 |
| Gm10364       | glyceraldehyde-3-phosphate dehydrogenase pseudogene                        | 3.88  | 8.9E-04 | 0.04 |
| Cfap126       | cilia and flagella associated protein 126                                  | -4.86 | 8.9E-04 | 0.04 |
| Pou2f2        | POU domain, class 2, transcription factor 2                                | -1.47 | 9.0E-04 | 0.04 |
| Tnnt2         | troponin T2, cardiac                                                       | -5.45 | 9.2E-04 | 0.04 |
| Gm16486       | predicted gene 16486                                                       | -3.21 | 9.3E-04 | 0.04 |
| Alas1         | aminolevulinic acid synthase 1                                             | 1.52  | 9.4E-04 | 0.04 |
| Tlr3          | toll-like receptor 3                                                       | -1.96 | 9.4E-04 | 0.04 |
| Gm19931       | protein LLP homolog                                                        | -4.77 | 9.4E-04 | 0.04 |
| Tcaf1         | TRPM8 channel-associated factor 1                                          | -5.32 | 9.5E-04 | 0.04 |
| H2-DMb1       | histocompatibility 2, class II, locus Mb1                                  | -1.93 | 9.5E-04 | 0.04 |
| E230020A03Rik | RIKEN cDNA E230020A03 gene                                                 | -4.63 | 9.5E-04 | 0.04 |
| Tnfrsf12a     | tumor necrosis factor receptor superfamily, member 12a                     | -2.56 | 9.7E-04 | 0.04 |
| Ccnd1         | cyclin D1                                                                  | -1.38 | 9.8E-04 | 0.04 |
| Ampd2         | adenosine monophosphate deaminase 2                                        | 1.72  | 9.8E-04 | 0.04 |
| Sult1a1       | sulfotransferase family 1A, phenol-preferring, member 1                    | -3.16 | 9.8E-04 | 0.04 |
| Por           | P450 (cytochrome) oxidoreductase                                           | 1.07  | 9.9E-04 | 0.04 |
| mt-Nd2        | NA                                                                         | -1.94 | 9.9E-04 | 0.04 |
| Gm20544       | predicted gene 20544                                                       | 4.84  | 1.0E-03 | 0.04 |



**Table S9. Differentially Expressed Genes in Recipient Macrophages Devoid of *Ager* vs. WT. Comparison 4 (C4),  $p \leq 0.001$  and  $FDR \leq 0.2$ .**

| <u>SYMBOL</u> | <u>GENE NAME</u>                                  | <u>log2FC</u> | <u>P Value</u> | <u>FDR</u> |
|---------------|---------------------------------------------------|---------------|----------------|------------|
| Gm15487       | NA                                                | 4.63          | 1.8E-07        | 3.1E-03    |
| Rspo1         | R-spondin 1                                       | -6.43         | 3.9E-07        | 3.4E-03    |
| Hmga1-rs1     | high mobility group AT-hook I, related sequence 1 | 5.18          | 9.1E-07        | 4.3E-03    |
| Gm9825        | ribonucleic acid binding protein S1 pseudogene    | 4.89          | 9.9E-07        | 4.3E-03    |
| Rpl10a-ps2    | ribosomal protein L10A, pseudogene 2              | 5.00          | 1.9E-05        | 0.07       |
| Zfp383        | zinc finger protein 383                           | -4.85         | 4.0E-05        | 0.11       |
| Gdf9          | growth differentiation factor 9                   | -5.88         | 5.4E-05        | 0.13       |
| Oas3          | 2'-5' oligoadenylate synthetase 3                 | -1.53         | 6.4E-05        | 0.14       |
| Mir7027       | microRNA 7027                                     | -4.60         | 8.4E-05        | 0.16       |
| Irf7          | interferon regulatory factor 7                    | -1.68         | 9.8E-05        | 0.16       |
| Bag2          | BCL2-associated athanogene 2                      | -5.39         | 1.0E-04        | 0.16       |

**Table S10. TaqMan premade primers.**

| RT-PCR primers                        | Thermofisher Catalog # |
|---------------------------------------|------------------------|
| <i>Abca1</i>                          | Mm00442646_m1          |
| <i>Abcg1</i>                          | Mm00437390_m1          |
| <i>Ager</i>                           | Mm00545815_m1          |
| <i>Arg1</i>                           | Mm00475988_m1          |
| <i>Ccl2</i>                           | Mm00441242_m1          |
| <i>Cd36</i>                           | Mm00432403_m1          |
| <i>Hmgcr</i>                          | Mm01282499_m1          |
| <i>Hprt</i>                           | Mm03024075_m1          |
| <i>Il6</i>                            | Mm00446190_m1          |
| <i>Il10</i>                           | Mm01288386_m1          |
| <i>Irf7</i>                           | Mm00516793_g1          |
| <i>Nr1h3 (Lxr<math>\alpha</math>)</i> | Mm00443451_m1          |
| <i>Nr1h2 (Lxr<math>\beta</math>)</i>  | Mm00437265_m1          |
| <i>Nos2</i>                           | Mm00440502_m1          |
| <i>Tnfa</i>                           | Mm00443258_m1          |
| <i>Scap</i>                           | Mm01250176_m1          |
| <i>Srebp1</i>                         | Mm00550338_m1          |
| <i>18S</i>                            | Hs99999901_s1          |
